---

# 1     **Meta-analysis of the effects of sleep deprivation on depression in** 2                                   **patients and animals**

3     **Baiqi Hu<sup>1a</sup>, Mengfei Ye<sup>2a</sup>, Dan Feng<sup>1a</sup>, Jianghua Ying<sup>1</sup>, Tingting Mou<sup>1</sup>, Fangyi Luo<sup>1</sup>,**  
4     **Tingting Lv<sup>1</sup>, Liya Jiang<sup>1</sup>, Chao Qian<sup>2</sup>, Zhinan Ding<sup>1,3</sup>, Chaoyang Yu<sup>1</sup>, Hui Gao<sup>1</sup>, Jian**  
5     **Zhang<sup>1</sup>, Zheng Liu<sup>1,3\*</sup>**

6     <sup>1</sup>Department of Behavioral Neurosciences, Science Research Center of Medical School,  
7     Shaoxing University, Shaoxing, Zhejiang, China

8     <sup>2</sup>Department of Psychiatry, Shaoxing seventh people's hospital, Shaoxing, Zhejiang, China

9     <sup>3</sup>Laboratory of Forensic Toxicology, Shaoxing University Forensic Center, Shaoxing, Zhejiang,  
10    China

11    \* Corresponding author at: Department of Behavioral Neurosciences, Science Research  
12    Center of Medical School, Shaoxing University, Shaoxing, Zhejiang, China, 312000

13    E-mail: liuzheng1707@163.com

14    <sup>a</sup> These authors contributed equally to this work.

15  
16    **Objective:** Research on the antidepressant effects of sleep deprivation (SD) is lagging and has  
17    not produced completely uniform results in humans and animals. The present study aimed to  
18    reassess the effect of SD on patients and animals by meta-analysis based on updated research.

19    **Methods:** We searched PubMed, Embase and Cochrane Library for articles since the first  
20    relevant literature published up to June 10th, 2019. Data on sample characteristics, features of  
21    SD, and tests for depression were extracted. **Results:** Fourteen articles were included, eight  
22    on humans and six on animals. We found that when the duration of SD in patients was 7–14  
23    days, it reflected antidepressant [-1.52 (-2.07, -0.97);  $I^2=19.6%$ ]. In animals, the results of  
24    sucrose consumption experiments showed that SD has depressogenic effects [-1.06 (-1.63,

25 -0.49);  $I^2=81.1\%$ ], while the results of forced swimming experiments showed that SD treated  
26 depression [-1.17 (-2.19, -0.16);  $I^2=80.1\%$ ], regardless of the duration of sleep deprivation.

27 **Conclusion:** SD can be an effective antidepressant measure when the duration is 7–14 days in  
28 patients. In animal studies, SD has shown more antidepressant effects when measured by  
29 forced swimming experiments, whereas using sucrose consumption tests had the effect of  
30 worsening depression.

31 **Keywords:**

32 Sleep deprivation; depression; forced swimming test; sucrose consumption test; meta-analysis

33

34 **List of abbreviations:**

35 BDNF = brain-derived neurotrophic factor; BLT = bright light therapy; CBT = cognitive  
36 behavioral treatment; HAMD = Hamilton depression scale; PSD = partial sleep deprivation;  
37 RCT = randomized controlled trials; rTMS = repetitive transcranial magnetic stimulation; SD  
38 = sleep deprivation; SMD = standard mean difference; SSRIs = selective serotonin reuptake  
39 inhibitors; TCAs = tricyclic antidepressive agents; TSD = total sleep deprivation

40 **1. Introduction**

41 Depression is a common, debilitating, and potentially lethal disorder that can affect  
42 people of all ages [1]. Over 300 million people worldwide suffer from depression; the World  
43 Health Organization (WHO) ranks it as the single largest contributor to global disability,  
44 accounting for 13.4% of “years of life lived with a disability” in women and 8.3% in men [2,  
45 3]. Close to 800 000 depression patients die due to suicide every year. Suicide is the second  
46 leading cause of death in 15-29-year-olds [4]. Since relapse rates for depressive disorder are  
47 high, various potentially negative long-term outcomes are associated with it, including  
48 difficulties with interpersonal relationships, efficacy, tolerability and acceptability of

49 antidepressants [5, 6]. Most people with depression have tried at least one antidepressant  
50 medication, although medication effects are slow to manifest, and side effects such as  
51 insomnia and anxiety lead patients to try different medications or refuse medication altogether  
52 [7, 8]. Furthermore, 30%–40% of patients are resistant to available antidepressant  
53 medications commonly prescribed for the major depressive disorder [9].

54 As a result of difficulties encountered when treating depression, there is an urgent need to  
55 find a nonpharmacologic therapy for it. In clinical practice, many nonpharmacologic therapies  
56 have attracted special attention, such as sleep deprivation (SD)[7], bright light therapy (BLT)  
57 [10] , cognitive behavioral treatment (CBT)[11], and repetitive transcranial magnetic  
58 stimulation (rTMS)[7]. Among these, sleep deprivation therapy is one of the most rapid  
59 antidepressant interventions known [12]. Some clinical studies have shown that sleep  
60 deprivation (SD) is an effective treatment for patients with depression [13, 14]. Total sleep  
61 deprivation (TSD) for one whole night was found to improve depression symptoms in  
62 40%–60% of patients [15]. Unfortunately, the therapeutic effects of SD are transient, and the  
63 depression symptoms can even return after a subsequent full night of sleep [7, 16]. Some  
64 results have indicated that patients who use a combination of antidepressants and SD have a  
65 significantly lower tendency to relapse after a full night's sleep than those who do not [17].  
66 Therefore, we hypothesize that some combinations of depression therapy can enhance  
67 therapeutic effects of SD.

68 In the present study, we aimed to explore the effectiveness of SD on depression. The  
69 antidepressant effects of SD have often been reported in humans, yet despite a recent  
70 meta-analysis [7], comprehensive aggregated data are lagging. Literature on SD lacks  
71 randomized controlled trials and has shown inconsistent results. The literature is not  
72 up-to-date, as the most recent study on SD was published in 2009. The duration of sleep  
73 deprivation has not been standardized across studies, which may have led to inconsistent

---

74 results, so we explored whether SD treatment for patients with depression requires a more  
75 specific treatment course. In animals, the effects of SD have not been completely uniform.  
76 Animal models are a cornerstone of human research, particularly research on depression at the  
77 level of tissues, cells, molecules, and genes. However, no relevant meta-analyses have  
78 provided comprehensive results regarding animals. This article, using meta-analyses, provides  
79 an update on the effects of SD on patients and explores the effects of experimental SD on  
80 animals. At the same time, we discuss and evaluate whether sleep deprivation has a consistent  
81 effect on depression in animals and humans.

## 82 **2. Methods**

### 83 **2.1 Literature search strategy**

84 Studies related to the effects of SD on depression in patients or animals were identified by  
85 searching three different electronic databases (PubMed, Embase and Cochrane Library) for  
86 articles since the first relevant literature published up to June 10th, 2019, using the keywords  
87 (“sleep deprivation” OR “sleep curtailment” OR “sleep restriction” OR “sleep loss”) AND  
88 (“depression” OR “mood disorders”) in the title/abstract. A total of 1164 records meeting both  
89 search terms were returned. We excluded unmatched studies by keyword (case, review, report,  
90 and meta-analysis) and then selected studies to include or exclude according to titles and  
91 summaries. Additionally, relevant original studies cited in the selected articles were also  
92 eligible for inclusion. Final inclusion was determined by reading the full text of the studies.

### 93 **2.2 Inclusion criteria**

94 All included studies in this article met the criteria described by the participants,  
95 intervention, comparison, outcome, and study design (PICOS) according to recommendations  
96 by PRISMA and supplemented with criteria by the Quality Assessment of Diagnostic

97 Accuracy 2 and the Newcastle-Ottawa Scale.

98 Patients: Patients included were between the ages of 12–80 years who had been  
99 diagnosed with depression based on the Diagnostic and Statistical Manual of Mental  
100 Disorders (DSM) and International Classification of Diseases (ICD) criteria, regardless of  
101 depression type (bipolar or unipolar) and gender (P); sleep deprivation (I); comparison to  
102 control conditions, there was SD design in the experimental conditions (C); outcome  
103 measures of the Hamilton depression scale (HAMD), Beck Depression Inventory (BDI), and  
104 the Montgomery Asberg Rating (MADRS) (O); and RCTs (S). In addition, patients who had  
105 serious organic diseases or mental and somatic comorbidities and pregnant women were  
106 excluded.

107 Animals: Differing from the requirements for depressed patients, it was not necessary to  
108 establish depressive-like behavior models in animals before the intervention (P); experimental  
109 SD (I); comparison to control conditions, there was SD design in the experimental  
110 conditions (C); outcome measures of open field experiments, sucrose consumption tests, and  
111 forced swimming tests (O); and RCTs (S).

112 Articles lacking either the full text or primary data findings that could not be resolved  
113 with engage digitizer were excluded.

### 114 **2.3 Data extraction and quality assessment**

115 Each article was read in its entirety by two researchers to extract the data and record the  
116 trial details in a standardized table containing the following information: author(s), year of  
117 publication, country, participant characteristics (e.g., sample size, age, gender, and sample  
118 type), SD characteristics (e.g., type and duration), adjunctive method (e.g., bright light  
119 therapy, cognitive behavioral treatment, and antidepressant drug), and outcomes for patients.  
120 Regarding animals, species, SD method, and depression test were also added. When no

121 specific data were included—only graphs or figures—the authors were contacted and asked to  
122 provide the results of their experiments or the raw data. If that failed, data were estimated  
123 based on graphs or figures using a digital ruler[18, 19]. Primary data were estimated  
124 according to coordinate positions, and then statistical methods were used to calculate mean  
125 and SD. The risk of bias was estimated independently by two researchers (J. Y. and T. M.),  
126 who extracted and appraised the data, using the Cochrane Risk of Bias tool [20].  
127 Inconsistencies between the two researchers were resolved through negotiation; when that  
128 failed, a third person was asked to judge.

#### 129 **2.4 Data synthesis and analysis**

130 First, to assess the effects of SD on depression, we conducted a comprehensive analysis of  
131 the selected trials. Then, we performed a hierarchical analysis based on a significant  
132 variable(duration of SD)on patients. Subsequently, subgroup analysis was used to determine  
133 the sources of heterogeneity. We performed subgroup analysis by country and adjunctive  
134 method for the patient studies and by depression test for the animal studies. For each  
135 comparison, we numerated the standardized mean difference based on Hedges'  $g$  as a measure  
136 of effect size, with value ranges of small (0.2–0.5), medium (0.5–0.8), and large (0.8 and  
137 above), as per standard convention. This approach can ignore differences in depression  
138 measurement tools so the analysis can be unified. We used the random-effects model by  
139 DerSimonian and Laird[21]. Funnel plots and the Egger test were used to examine the risk of  
140 effect size for small studies.

141 The heterogeneity of effect size within each comparison was tested using Cochran's  $Q$   
142 test and  $I^2$  statistics. Data were presented as effect size  $\pm$  confidence intervals at 95%. Results  
143 were considered significant when the confidence interval range was lower or higher than zero  
144 and associated with a Cochran's  $Q$   $p$ -value lower than 0.05. All calculations were performed

145 using Stata version 13.1.

## 146 **3. Results**

### 147 **3.1 Study characteristics**

148 Our search strategy resulted in 1164 articles from PubMed and other databases (Fig. 1).  
149 Redundant literature was eliminated, and literature was filtered for relevance according to  
150 keywords (case, review, meta-analysis, and report), after which 77 articles were excluded.  
151 After the removal of titles and abstracts, there were 30 articles that were screened by reading  
152 the full text. After excluding articles that lacked control group or primary data, a total of 14  
153 studies meeting the inclusion criteria were ultimately included in our meta-analysis.

154 Among these, six were animal studies involving 13 trials and eight were patient studies  
155 involving 9 trials. For patient studies, TSD was applied in five articles, while partial sleep  
156 deprivation (PSD) was applied in three articles. No record of sleep curtailment, sleep  
157 restriction, or sleep loss was included. Most studies were conducted in Germany, the United  
158 States of America (USA), Turkey, Switzerland, and the Netherlands. All studies involved a  
159 combination of SD and other interventions. For instance, in human studies, six involved  
160 antidepressant drugs, and the other two involved, separately, BLT and CBT. Two of the animal  
161 studies were conducted on mice, and four were conducted on rats, including various species  
162 such as BALB/c, C57BL strains, Wistar, and Sprague-Dawley strains. The depression tests for  
163 animals included sucrose consumption tests, open-field tests, and forced swimming tests  
164 (Tables 1 and 2).

### 165 **3.2 Study quality**

166 **Patients:** Most studies adopted RCT, most random sequence generation indicated a low  
167 risk of bias[22]. Performance bias was not mentioned in most of the articles and was therefore

168 mostly an unclear bias risk. Although the articles did not mention detection bias, the degree of  
169 depression was quantitatively measured by the depression scale; therefore, the tester factor  
170 had little influence, and the authors believed there was a low risk of detection bias. Two  
171 studies clearly did not blind participants and therefore had a high risk of bias, which can be  
172 considered the shortcomings of those studies [23, 24]. The final data for one study were  
173 unclear; thus, a high risk of bias was identified for the outcome of that study [25]. Unclear  
174 bias accounted for the majority of other biases since some literature only provided images  
175 instead of concrete data; thus the data obtained through software processing could have had  
176 some impact (Fig. 2A).

177 **Animals:** Participant blindness was not always mentioned, but in animal experiments, it  
178 was assumed to involve a low risk of bias. Only a few articles described the blinding method  
179 for study outcomes, which was considered as involving a low risk of bias, while the others  
180 were considered as having unclear bias without reference. Presentation of the results was  
181 complete in most articles, but one article did not provide the final data[26]; therefore, a high  
182 risk of bias was identified for the outcome of that study (Fig. 2B).

### 183 **3.3 Main efficacy of the meta-analysis**

184 **Patients:** Fig. 3 shows the total effect of SD on depression. Nine trials (10 datasets)  
185 reported depression using the HAMD. The random-effects meta-analysis elicited a summary  
186 effect size of -0.15 (95% CI, -0.80 to 0.50;  $I^2=84.3\%$ ;  $P<0.001$ ). When analyzed according to  
187 the SD schedule (<7 days, 7–14 days, >14 days), the forest plot showed that an SD duration  
188 of less than 7 days had a small effect of worsening depression [0.24 (-0.21, 0.69);  $I^2=0\%$ ;  
189  $P=0.43$ ], a duration of 7–14 days had an antidepressant effect [-1.52 (-2.07, -0.97);  $I^2=19.6\%$ ;  
190  $P=0.288$ ], and a duration of more than 14 days had the effect of worsening depression [0.76  
191 (0.12, 1.40);  $I^2=43.7\%$ ;  $P=0.169$ ] (Fig. 4A).



192       **Animals:** The overall data suggested that SD had no significant effect on depression, and  
193 there was high heterogeneity [-0.28 (-0.73, 0.17);  $I^2=86.8\%$ ;  $P<0.001$ ] (Fig. 5).

### 194 **3.4 Heterogeneity analyses**

195       Through subgroup analysis, we identified sources of research heterogeneity, which could  
196 have been related to the country where the research was conducted, the type of combined  
197 therapy employed, and the depression test that was used. For patients, the studies were  
198 divided into five subgroups according to country (Fig. 4B). Studies from Turkey showed high  
199 antidepressant effect sizes [-1.77 (-2.35, -1.19);  $I^2=0\%$ ;  $P=0.586$ ], while studies from  
200 Switzerland showed high effect sizes for worsened depression [1.07 (0.51, 1.63);  $I^2=0\%$ ;  
201  $P=0.845$ ]. The studies were also divided into four subgroups for combined therapy (Fig. 4C).  
202 Studies that combined selective serotonin reuptake inhibitors (SSRIs) with SD showed an  
203 antidepressant effect [-1.77 (-2.35, -1.19);  $I^2=0\%$ ;  $P=0.586$ ].

204       The animal studies were divided into three subgroups according to the depression test  
205 used. Those using the sucrose consumption test to assess the level of depression indicated that  
206 SD worsened depression [-1.06 (-1.63, -0.49) (Fig. 6A);  $I^2=81.1\%$ ;  $P<0.001$ ], while those  
207 using forced swimming tests showed high antidepressant effects with SD [-1.17 (-2.19, -0.16);  
208  $I^2=80.1\%$ ;  $P=0.002$ ] (Fig. 6B). Open-field tests showed no statistically significant differences  
209 [0.24 (-0.45, 0.92);  $I^2=89.1\%$ ;  $P<0.001$ ] (Fig. 6C). Sensitivity analysis revealed that the  
210 heterogeneity of the 7–14-day group decreased from 66.6% to 19.6%, indicating that the  
211 effect of SD on depression was related to its duration.

## 212 **4. Discussion**

213       Sleep accounts for about one-third of human life, and it is well known that sleep maintains  
214 physical strength, restores energy, promotes growth and development, and delays aging and

215 disease. Lack of sleep or fragmented sleep can lead to listlessness, decreased alertness, and  
216 decreased concentration at work. Severe sleep deprivation can lead to physical injury and  
217 even diseases, such as coronary heart disease, hypertension, arrhythmia, diabetes and obesity,  
218 weakened immunity, and death from overwork [27]. Moderate SD, however, may be regarded  
219 as an excellent option for an accelerated response to the treatment of depression since it is  
220 well tolerated and is devoid of the potential for drug interaction[28]. After treatment with SD,  
221 depressive symptoms have been shown to be relieved, although symptoms return to the same  
222 intensity within a few days [15].

223 Despite these findings, the therapeutic effect of SD is controversial. Much like the  
224 extreme of sleep deprivation, a long duration of SD may cause great harm to the human body  
225 [28]. If the duration of SD is short, the results may be affected by depression relapse [17].  
226 When combined with other antidepressant treatments, SD may enhance its effectiveness.  
227 Other treatments for depression have included light therapy and pharmacologic treatment.  
228 One study found that light therapy was effective for seasonal depression [29], and a  
229 meta-analysis found that BLT seemed efficacious, especially when administered for 2–5  
230 weeks and as monotherapy [10]. However, light therapy alone was not as effective as SD [30].  
231 As for medication alone, the effects are slow to manifest, and side effects may cause patients  
232 to change medication or refuse it altogether [7, 8]. For these reasons, many researchers have  
233 tried combining antidepressants with sleep deprivation, BLT, or CBT to form integrated  
234 antidepressant treatments, which have been shown to have positive effects [31, 32]. Studies  
235 that combined SD with selective serotonin reuptake inhibitors (SSRIs) showed an  
236 antidepressant effect.

237 The mechanism of SD in treating depression is very complex and can be interpreted  
238 based on monoaminergic neurotransmission, neuroplasticity, and gene expression.  
239 Brain-derived neurotrophic factor (BDNF) levels have been shown to be reduced in

240 individuals suffering from a major depressive disorder, and decreased levels were also  
241 negatively correlated with HAM-D scores. Use of SD has resulted in faster treatment response  
242 and increased BDNF levels [24]. One study found that in patients who achieved an  
243 antidepressant effect after SD, the expression of the circadian clock genes (e.g., RORA,  
244 DEC2, and PER1) increased, but in patients without such an effect, a significant decrease in  
245 the expression of these genes was found [33, 34].

246 All fourteen articles included used RCT models, which helped to improve the rigor and  
247 significance of our review. Judging from the total results of the patient studies, our data were  
248 not as obvious as in previous meta-analyses and were highly heterogeneous [7]. This was  
249 because we included new research and because we used digital software to address instances  
250 of incomplete data. After one paper [35] was removed through sensitivity analysis, the  
251 heterogeneity of the 7–14-day group decreased from 66.6% to 19.6%, indicating that the  
252 effect of SD on depression was related to SD duration. As the forest plot shows, a duration of  
253 less than 7 days had a small effect of worsening depression, a duration of 7–14 days had an  
254 antidepressant effect, and a duration of more than 14 days had the effect of worsening  
255 depression.

256 Several articles reported that depression symptoms returned immediately after SD and  
257 recovery, with some patients experiencing more severe depression than before [16]. In the <7  
258 days group, SD only occurred once with a duration of < 36 hours. Therefore, it was very  
259 likely that the depression symptoms had recurred following a night of SD intervention, and  
260 that the results had a small effect of worsening depression [17]. Sleep loss, especially when  
261 chronic, can cause significant and cumulative neurobehavioral deficits and physiological  
262 changes, some of which may account for inattention, slowed working memory, reduced  
263 cognitive throughput, depressed mood, and perseveration of thought [36]. Thus, prolonged  
264 and repeated SD could worsen depression, which might account for the increased depression

265 in groups with a duration of more than 14 days. With 7–14 days of SD, the interference of the  
266 first two conditions might be slightly avoided, thus providing a better therapeutic effect. The  
267 heterogeneity of this group mainly came from differences in sample type among the other  
268 three articles [35]. Studies have indicated that in unipolar depressed samples, the response rate  
269 to SD was 50.6%, and in samples using a mixture of unipolar and bipolar depressed patients,  
270 the response rate was 53.1% [7]. We guessed, therefore, that different types of depression  
271 samples had different response rates to SD. However, with the small amount of literature  
272 included in this study, it was impossible to clearly explore similar results.

273         Given the large heterogeneity in the total dataset, sources of heterogeneity were explored  
274 for potential influencing variables. The first analysis was a subgroup analysis by country.  
275 Different countries have different factors affecting the occurrence, treatment, and prognosis of  
276 depression, such as national health awareness, cultural and educational quality, medical  
277 research level, medical and social security, family economic income and social welfare, and  
278 social support systems [37, 38]. In studies from Turkey, there was an antidepressant effect of  
279 SD [-1.77 (-2.35, -1.19);  $I^2=0\%$ ;  $P=0.586$ ]. Meanwhile, studies from Switzerland showed that  
280 SD worsened depression [1.07 (0.51, 1.63);  $I^2=0\%$ ;  $P=0.845$ ]. These findings suggest that the  
281 effect of SD on depression may be related to ethnicity and nationality. Although relatively few  
282 articles were included in this study, based on the available data, we speculate that the  
283 treatment effect of SD on depression may be more likely to be observed in studies conducted  
284 in the Turkish context. An adverse effect of SD was observed in patients from Switzerland in  
285 one paper, so more studies are needed for verification. Since most patients fell into the  
286 diagnostic category of major depression, we speculated that the intervening effect of SD was  
287 more obvious for major depression. It is possible that the higher the level of depression, the  
288 more significant the therapeutic effect of SD.

289         In light of the above, the following points are relevant: 1) Turkey has low levels of

290 economic and medical academic development and education, while Switzerland has high  
291 levels of those indices. 2) Two papers from Turkey included in this study [23, 24] had female  
292 patient proportions of 79% and 73.2%, while the paper from Switzerland had a female patient  
293 proportion of 39.3%. Depression levels in the Turkish studies could have been significantly  
294 related to the medical academic development. In consideration of the possible effects of racial  
295 diversity, further studies are needed to examine the effects of SD on depression across various  
296 ethnic groups.

297 The other subgroup analysis concerned whether there was a combination of SD with  
298 other therapies. Combined with BLT, CBT, and tricyclic antidepressive agents (TCAs), SD  
299 was shown to have no significant effect on depression. Three studies of SD combined with  
300 SSRIs showed an antidepressant effect; after removing one study [28] with fewer than seven  
301 patients in each group, which could have affected the outcome, the effect size went from  
302 [-0.58 (-1.94, 0.78)] to [-1.77 (-2.35, -1.19)], and heterogeneity went from 84.3% to 0. We  
303 suspect that heterogeneity could have been related to three aspects: 1) Patients in one of the  
304 studies were from USA, and those in the other two were from Turkey. This correlates with the  
305 results of the above analysis. 2) One study incorporated paroxetine, while sertraline was used  
306 in the other two, so heterogeneity could also have come from the use of different SSRIs. One  
307 paper's authors stated that although sertraline and paroxetine had comparable efficacy for  
308 major depression, patients who used sertraline had a lower recurrence rate than those who  
309 used paroxetine. Sertraline was somewhat better tolerated than paroxetine and had a lower  
310 side-effect profile [39]. 3) The duration of SD in one study was less than 7 days, while it was  
311 7–14 days in the other two studies.

312 In animal experiments, the overall results from data with high heterogeneity were not  
313 statistically significant and could have been related to the inconsistent effects of SD. While  
314 some studies reported antidepressant results from SD, others reported depressed results.

315 Therefore, we used the most significant subgroup analysis (depression testing tool) to  
316 examine the sources of heterogeneity. After one paper was removed through sensitivity  
317 analysis, the heterogeneity went from 81.1% to 66.3%, and the standard mean difference  
318 (SMD) value for the sucrose consumption test changed from [-0.79 (-1.51, -0.07)] to [-1.06  
319 (-1.63, -0.49)], which showed the effect of worsening depression. This increase in effect size  
320 could be related to the following: 1) The animals included rats and mice, which could be the  
321 source of heterogeneity. The mice and rats belonged to different species (BALB/c, C57BL,  
322 and Sprague-Dawley) with the corresponding genetic and biological characteristics. This  
323 could have led to some differences in the sensitivity of animals to SD and sucrose  
324 consumption experiments. We suspect that mouse models are more likely to derive depressive  
325 effects from SD, but further research is needed to verify this. 2) The removed paper proposed  
326 building a depression model using the chronic unpredictable stress method. Other groups did  
327 not explicitly note the establishment of the depression model. We did not consider whether an  
328 animal model for depression was clearly established as an inclusion criterion because we  
329 believed the experiments to test the degree of depression had an effect on the animal's mental  
330 condition. However, the establishment of a depression model could cause animals to be  
331 consistent and reduce the effect of different depression experiments on the test results. Based  
332 on our sensitivity analysis, we believed the source of heterogeneity could be the depression  
333 model. In the sucrose consumption test, those without a depression model were more likely to  
334 be depressed by SD. 3) The literature that had been excluded did not mention the type of SD  
335 used, but the rest of the group used paradoxical SD. Although the background in the literature  
336 was not rich enough, we suspected that paradoxical SD was more likely to worsen depression.

337 Sensitivity analysis performed on the forced swimming test changed its effect size from  
338 [-0.71 (-1.53, 0.12)] to [-1.17 (-2.19, -0.16)], and heterogeneity went from 80.3% to 80.1%  
339 after one paper was excluded and reflected an antidepressant effect. Changes in effects could

340 come about in two ways: 1) The excluded paper was from China, and the other papers were  
341 from Mexico. There is a certain gap in the level of scientific research development between  
342 China and Mexico, and there could have been differences in the experimental design, degree  
343 of rigor, scientific research concept, and environmental climate. Even if the living  
344 environment of the mice was controlled in the experimental design, it might still be affected  
345 by the local environment. We hypothesized, therefore, that between Mexico and China,  
346 perhaps the Mexican studies were more likely to show the therapeutic effect of SD on  
347 depression. 2) The animal species in the excluded paper were of the C57BL/6J type, while the  
348 others were BALB/c. Inbred C57BL/6 mice show low spontaneous activity, poor ability to  
349 explore novel environments, and proneness to behavioral despair under acute stress  
350 stimulation [40]. Therefore, in the forced swimming experiment, the expression of depression  
351 in C57BL/6J mice could have been influenced by their biological characteristics in that they  
352 were more likely to show depressive symptoms, and we suspect the therapeutic effect of SD is  
353 more pronounced in BALB/c mice. The study using an open field trial to test depression  
354 found that SD had no significant effect on depression and had high heterogeneity, which could  
355 have been related to complex experimental methods, including multiple unit tests and uneven  
356 quality analysis.

357 This meta-analysis included patient studies to explore the clinical effects of SD and to  
358 find the best way to use SD to treat depression. Because some monitoring indicators, such as  
359 changes in neurotransmitters, are more likely to show up in animals, analysis of animal  
360 studies was used to address the deficiencies encountered with patient analysis of SD  
361 treatments. Regardless of the reason, we should be aware of the risks involved in interpreting  
362 the efficacy and effectiveness of SD based on the discrepancies between rodent and human  
363 research.

364 In animal studies, many documents showed that SD affects depressive episodes by

365 altering the regulation of serum corticosterone[41], BDNF[24], and other  
366 neurotransmitters[42]. Sleep deprivation is closely linked with the downregulation of  
367 miR-10B and possibly the upregulation of BDNF in the hippocampus in rats subjected to  
368 chronic unpredictable stress[43]. Sleep deprivation can decrease serum corticosterone levels  
369 of rats with depression, and SD improves depression in depressive rats, including  
370 hyperactivity of hypothalamus-pituitary-adrenal gland axis[41]. For the overall meta-analysis,  
371 no effect of SD on depression was observed in patients and animals, although significant  
372 effects were detected as a consequence of SD in the sensitivity analysis. Because there are  
373 differences between the effects of SD on animals and patients under certain conditions, some  
374 explanations can be proposed for the discrepancies. The first is the differences between  
375 species. Second, the methods used to test the effect of SD are qualitatively different.  
376 Depression is detected in animals using objective behavioral indicators, while it is measured  
377 in patients using subjective scoring scales. Preclinical animal studies that use a non-applicable  
378 method to assess a human condition may lack coherence and meaning in their results. It is  
379 imperative that researchers performing animal studies use the best methods available to  
380 acquire the best possible results. As this article shows, when studying the antidepressant effect  
381 of SD, the forced swimming trial can be used; when studying the depressive effect of SD, the  
382 sucrose consumption test can be used. In addition, BALB/c mice are also more likely to show  
383 the antidepressant effects of SD. By such selection, it is possible to study the mechanism of  
384 sleep deprivation in animals with a smaller margin of error.

### 385 **5.1 Clinical and experimental implications**

386 Based on this study's findings, confining the duration of SD treatment to 7–14 days could  
387 be a clinically feasible way to enhance its therapeutic effect. Regarding combination treatment,  
388 SD and SSRI medications can be attempted. Combined with clinical practice, TCAs give



389 more troublesome side effects and have the potential for fatal overdose, so SSRIs may be  
390 safer [44]. This study did not include papers with methods combining three or more therapies,  
391 so further study is needed. In animal research, the same trend method can be used to reduce  
392 the interference of depression evaluation tests on the results. When studying the  
393 antidepressant effect of SD, the forced swimming trial can be used; when studying the  
394 depressive effect of SD, the sucrose consumption test can be used. The above findings belong  
395 to the speculative aspects of this study, which need to be refined and improved by more  
396 extensive studies.

## 397 **5.2 Study limitations**

398 Aside from the above-mentioned speculations, several limitations should be noted. The  
399 quantity of literature included in this study was small, which could make the results less  
400 convincing. Second, the data derived using digital software were different from the actual  
401 study results, meaning there was a certain degree of data error. Third, there was no uniform  
402 model for depression in animals, and the differing results could have been produced by the  
403 depression tests that were employed. Future research should target such limitations.

## 404 **6. Conclusion**

405 Our meta-analysis showed that SD could be an effective antidepressant measure when the  
406 treatment duration is 7–14 days. Meanwhile, a duration of less than 7 days had a small effect  
407 of worsening depression, while a duration of more than 14 days had the effect of worsening  
408 depression. Additionally, in animal studies, depression was measured using the forced  
409 swimming experiment, which showed more antidepressant effects, while using the sucrose  
410 consumption test had the effect of worsening depression. These findings suggest that SD  
411 should be used as an intervention for depressed people within specific parameters. Further

412 high-quality research with long-term follow-ups is needed to strengthen the evidence.

### 413 **Acknowledgments**

414 This work was funded by the National Natural Science Foundation (nos. 81560059 and  
415 81760058), Public Welfare Technology Applied Research Projects in Zhejiang Province (no.  
416 2016C33191), Zhejiang Medical Health Science and Technology Project (no. 2019KY724,  
417 2020KY332), the Scientific Research Fund of Shaoxing University (no. 20125025), and the  
418 National Training Program of Innovation and Entrepreneurship for College Students (no.  
419 2017R10349001).

420

421

### 422 **Figures and Tables Legends**

423 **Fig. 1. Selection process for trials included in the meta-analyses.**

424

425 **Fig. 2. Risk-of-bias assessments of the included studies (domains from the Cochrane**  
426 **Handbook for Systematic Reviews of Interventions).**

427 A. Risk of bias assessments of the included patient studies.

428 B. Risk of bias assessments of the included animal studies.

429

430 **Fig. 3. Forest plot of the random-effects model meta-analysis of the effect of SD on**  
431 **patients.**

432

433 **Fig. 4. Forest plot of the random-effects model subgroup analysis of patients.**

434 A. Forest plot of the random-effects model subgroup analysis of patients with regard to the  
435 duration of SD.

---

436 B. Forest plot of the random-effects model subgroup analysis of patients with regard to the  
437 country.

438 C. Forest plot of the random-effects model subgroup analysis of patients with regard to  
439 combined therapy.

440 Abbreviations: BLT = bright light therapy; CBT = cognitive behavior therapy; SSRIs =  
441 selective serotonin reuptake inhibitors; SD = sleep deprivation; TCAs = tricyclic  
442 antidepressive agents; and USA = United States of America.

443

444 **Fig. 5. Forest plot of the random-effects model meta-analysis of the effect of SD on**  
445 **animals.**

446

447 **Fig. 6. Forest plot of the random-effects model subgroup analysis of animals.**

448 A. Forest plot of the random-effects model subgroup analysis of animals regarding the  
449 sucrose consumption test.

450 B. Forest plot of the random-effects model subgroup analysis of animals regarding the forced  
451 swimming test.

452 C. Forest plot of the random-effects model subgroup analysis of animals regarding the  
453 open-field test.

454 **Tables**455 **Table 1. Characteristics of the included patient studies.**

| Author(s)                        | Country          | Intervention      | Sample sizes | Age (mean, year) | Type of depression | SM   | Combined with other interventions | Duration | Depression scale                 |
|----------------------------------|------------------|-------------------|--------------|------------------|--------------------|------|-----------------------------------|----------|----------------------------------|
| Elsenga et al.,<br>1983[45]      | Nether-lan<br>ds | Clomipramine/SD   | 10           | 49.1±13.6        | Unipolar           | TSD  | Clomipramine                      | 7 days   | Hamilton<br>interview<br>ratings |
|                                  |                  | Clomipramine      | 10           | 55.6±13.2        |                    |      |                                   |          |                                  |
| Trachsler et<br>al.,<br>1994[25] | Switzer-la<br>nd | Trimipramine/SD   | 14           | 50.43±7.3        | Bipolar            | PSD  | Trimipramine                      | 28 days  | HRS,<br>MADRS                    |
|                                  |                  | Trimipramine      | 14           | 50.64±8.50       |                    |      |                                   |          |                                  |
| Kuhs et al.,<br>1996[35]         | Germany          | Amitriptyline/LSD | 27           | 43.3±13.6        | Bipolar            | LPSD | Amitriptyline                     | 14 days  | HAM-D,<br>10 Item                |
|                                  |                  | Amitriptyline     | 24           | 46.0±11.3        |                    |      |                                   |          |                                  |
| Caliyurt et al.,<br>2005[23]     | Turkey           | LPSD/Sertraline   | 13           | 38.46±12.03      | Unipolar           | LPSD | Sertraline                        | 14 days  | HAM-D,<br>21 Item                |
|                                  |                  | Sertraline        | 11           |                  |                    |      |                                   |          |                                  |

|                             |         |                |    |             |          |     |            |           |        |
|-----------------------------|---------|----------------|----|-------------|----------|-----|------------|-----------|--------|
| Kundermann et al., 2008[46] | Germany | TSD+CBT        | 9  | 37±2.7      | Unipolar | TSD | CBT        | 21 days   | HDRS   |
|                             |         | CBT            | 10 | 37.4±2.6    |          |     |            |           |        |
| Gorgulu et al., 2009[24]    | Turkey  | TSD/Sertraline | 19 | 40±11.69    | Unipolar | TSD | Sertraline | 7 days    | HAM-D  |
|                             |         | Sertraline     | 22 | 33.27±11.18 |          |     |            |           |        |
| Smith et al., 2009[47]      | USA     | TSD/Paroxetine | 7  | 69.0±4.6    | Unipolar | TSD | Paroxetine | 36 h      | HDS-13 |
|                             |         | TSD/Placebo    | 6  | 68.6±4.9    |          |     |            |           |        |
|                             |         | Paroxetine     | 3  | 71.4±6.0    |          |     |            |           |        |
| Gest et al., 2016[48]       | Germany | Wake/BLT       | 25 | 16.2±1.3    | Unipolar | TSD | BLT        | one night | BDI-II |
|                             |         | BLT            | 37 | 15.8±1      |          |     |            |           |        |

456 Abbreviations: BDI-II = Beck Depression Inventory-II; BLT = Bright Light Therapy; CBT = Cognitive behavioral therapy; HAM-D = Hamilton

457 Depression Scale ;HAM-D, 10 Item = Hamilton Depression Scale (10-item) ;HAM-D, 21 Item = Hamilton Depression Scale (21-item); HDRS =

458 Hamilton Depression Rating Scale ; HDS-13 = Hamilton Depression Scale (13-item); HRS = Hamilton Rating Scale for Depression; LPSD = the

459 late partial sleep deprivation; LPSD = the late partial sleep deprivation; MADRS = the Montgomery Asberg Rating ; PSD = partial sleep

460 deprivation; SD = sleep deprivation; SM = sleep manipulation; TSD = total sleep deprivation; USA = United States of America

461

462 **Table 2. Characteristics of the included animal studies.**

| Author(s)                 | Country | Intervention                                                             | Sample sizes                     | Species | Strain         | Gender | Age      | Depression model | SM     | Procedure            | Duration | Depression tests |
|---------------------------|---------|--------------------------------------------------------------------------|----------------------------------|---------|----------------|--------|----------|------------------|--------|----------------------|----------|------------------|
| Prathiba et al., 2000[42] | India   | RSD<br>Control                                                           | 8<br>8                           | Rats    | Wistar         | Male   | 3 months | Clomipramine     | REM SD | Pedestal above water | 4 days   | OFT              |
| Oliveira et al., 2004[49] | Brazil  | Control<br>VEN-1 group<br>VEN-10<br>REMSD<br>REMSD+VEN-1<br>REMSD+VEN-10 | 20<br>20<br>20<br>20<br>20<br>20 | Rats    | Wistar         | Female | 3 months | Not specified    | REM SD | Multiple-platform    | 72h      | OFT              |
| Zhu et al., 2005[41]      | China   | REMSD<br>Control                                                         | 8<br>8                           | Rats    | Sprague Dawley | Male   | Adult    | CMUS             | REM SD | Flowerpot            | 72h      | OFT              |

|                                 |        |                                                                                                              |                                  |      |                   |      |          |                     |                   |                         |            |            |
|---------------------------------|--------|--------------------------------------------------------------------------------------------------------------|----------------------------------|------|-------------------|------|----------|---------------------|-------------------|-------------------------|------------|------------|
| Jiang et al.,<br>2015[43]       | China  | RSD<br>Control                                                                                               | 10<br>10                         | Rats | Sprague<br>Dawley | Male | 3 months | CMUS for 3<br>weeks | Not<br>specified  | Platform above<br>water | 48h        | SCT<br>OFT |
| Gonzalez et<br>al.,<br>2016[50] | Mexico | Males Control<br>Males 48-h PSD<br>Males 96-h PSD<br>Females Control<br>Females 48-h PSD<br>Females 96-h PSD | 12<br>12<br>12<br>12<br>12<br>12 | Mice | BALB/c            | Both | 2 months | Not specified       | Paradoxical<br>SD | Multiple-platform       | 48h<br>96h | SCT<br>FST |

|                          |       |               |    |      |              |      |               |               |                   |                   |                  |                   |
|--------------------------|-------|---------------|----|------|--------------|------|---------------|---------------|-------------------|-------------------|------------------|-------------------|
| Wang et al.,<br>2017[26] | China | SD for 3 days | 10 | Mice | C57BL/<br>6J | Male | 2-3<br>months | Not specified | Paradoxical<br>SD | Multiple-platform | 3 days<br>5 days | SCT<br>OFT<br>FST |
|                          |       | Control       | 10 |      |              |      |               |               |                   |                   |                  |                   |
|                          |       | SD for 5 days | 18 |      |              |      |               |               |                   |                   |                  |                   |
|                          |       | Control       | 18 |      |              |      |               |               |                   |                   |                  |                   |
|                          |       | FP5d+Sa       | 10 |      |              |      |               |               |                   |                   |                  |                   |
|                          |       | Control+Sa    | 10 |      |              |      |               |               |                   |                   |                  |                   |

463 Abbreviations: CMUS = chronic mild unpredictable stress ;FST = forced swimming test; SCT = sucrose consumption test; OFT = open-field test;

464 P5d = paradoxical sleep deprivation for 5 Days; PSD = partial sleep deprivation; RSD/REM SD = rapid eye movement sleep deprivation; Sa =

465 saline; SD = sleep deprivation; SM = sleep manipulation; VEN-1 group = Venlafaxine-1 group



## References

- [1] Tang Q, Li G, Wang A, Liu T, Feng S, Guo Z, et al. A systematic review for the antidepressant effects of sleep deprivation with repetitive transcranial magnetic stimulation. *BMC Psychiatry*. 2015;15:282.
- [2] Ferrari AJ, Somerville AJ, Baxter AJ, Norman R, Patten SB, Vos T, et al. Global variation in the prevalence and incidence of major depressive disorder: a systematic review of the epidemiological literature. *Psychol Med*. 2013;43:471-81.
- [3] Ustun TB, Ayuso-Mateos JL, Chatterji S, Mathers C, Murray CJ. Global burden of depressive disorders in the year 2000. *Br J Psychiatry*. 2004;184:386-92.
- [4] Depression [EB/OL]. World Health Organization WHO. March 2018; <https://www.who.int/zh/news-room/fact-sheets/detail/depression>.
- [5] Braun C, Bschor T, Franklin J, Baethge C. Suicides and Suicide Attempts during Long-Term Treatment with Antidepressants: A Meta-Analysis of 29 Placebo-Controlled Studies Including 6,934 Patients with Major Depressive Disorder. *Psychother Psychosom*. 2016;85:171-9.
- [6] Shinohara K, Efthimiou O, Ostinelli EG, Tomlinson A, Geddes JR, Nierenberg AA, et al. Comparative efficacy and acceptability of antidepressants in the long-term treatment of major depression: protocol for a systematic review and networkmeta-analysis. *BMJ Open*. 2019;9:e027574.
- [7] Boland EM, Rao H, Dinges DF, Smith RV, Goel N, Detre JA, et al. Meta-Analysis of the Antidepressant Effects of Acute Sleep Deprivation. *J Clin Psychiatry*. 2017;78:e1020-e34.
- [8] Stanners MN, Barton CA, Shakib S, Winefield HR. Depression diagnosis and treatment amongst multimorbid patients: a thematic analysis. *BMC Fam Pract*. 2014;15:124.
- [9] Kornstein SG, Schneider RK. Clinical features of treatment-resistant depression. *J Clin Psychiatry*. 2001;62 Suppl 16:18-25.
- [10] Al-Karawi D, Jubair L. Bright light therapy for nonseasonal depression: Meta-analysis of clinical trials. *J Affect Disord*. 2016;198:64-71.
- [11] Cuijpers P, Cristea IA, Karyotaki E, Reijnders M, Huibers MJ. How effective are cognitive behavior therapies for major depression and anxiety disorders? A meta-analytic update of the evidence. *World Psychiatry*. 2016;15:245-58.
- [12] Wirz-Justice A, Van den Hoofdakker RH. Sleep deprivation in depression: what do we know, where do we go? *Biol Psychiatry*. 1999;46:445-53.
- [13] Dugovic C, Solberg LC, Redei E, Van Reeth O, Turek FW. Sleep in the Wistar-Kyoto rat, a putative genetic animal model for depression. *Neuroreport*. 2000;11:627-31.
- [14] Schumann G, Benedetti F, Voderholzer U, Kammerer N, Hemmeter U, Travers HW, et al. Antidepressive response to sleep deprivation in unipolar depression is not associated with dopamine D3 receptor genotype. *Neuropsychobiology*. 2001;43:127-30.
- [15] Giedke H, Schwarzler F. Therapeutic use of sleep deprivation in depression. *Sleep Med Rev*. 2002;6:361-77.
- [16] Suchecki D, Tiba PA, Machado RB. REM Sleep Rebound as an Adaptive Response to Stressful Situations. *Front Neurol*. 2012;3:41.
- [17] Wu JC, Bunney WE. The biological basis of an antidepressant response to sleep deprivation and relapse: review and hypothesis. *Am J Psychiatry*. 1990;147:14-21.
- [18] Song L, Xu MB, Zhou XL, Zhang DP, Zhang SL, Zheng GQ. A Preclinical Systematic Review of Ginsenoside-Rg1 in Experimental Parkinson's Disease. *Oxid Med Cell Longev*. 2017;2017:2163053.
- [19] Xie CL, Pan JL, Zhang SF, Gan J, Liu ZG. Effect of nicotine on L-dopa-induced dyskinesia in animal models of Parkinson's disease: a systematic review and meta-analysis. *Neurol Sci*. 2014;35:653-62.
- [20] Higgins JP, Altman DG, Gotzsche PC, Juni P, Moher D, Oxman AD, et al. The Cochrane Collaboration's tool for assessing risk of bias in randomised trials. *BMJ*. 2011;343:d5928.
- [21] DerSimonian R, Laird N. Meta-analysis in clinical trials. *Control Clin Trials*. 1986;7:177-88.
- [22] Schulz KF, Grimes DA. Unequal group sizes in randomised trials: guarding against guessing. *Lancet*. 2002;359:966-70.
- [23] Caliyurt O, Guducu F. Partial sleep deprivation therapy combined with sertraline affects subjective sleep quality in major depressive disorder. *Sleep Med*. 2005;6:555-9.
- [24] Gorgulu Y, Caliyurt O. Rapid antidepressant effects of sleep deprivation therapy correlates with serum BDNF changes in major depression. *Brain Res Bull*. 2009;80:158-62.
- [25] Holsboer-Trachsler E, Hemmeter U, Hatzinger M, Seifritz E, Gerhard U, Hobi V. Sleep deprivation and bright light as potential augmenters of antidepressant drug treatment--neurobiological and psychometric assessment of course. *J Psychiatr Res*. 1994;28:381-99.
- [26] Wang Z, Chen L, Zhang L, Wang X. Paradoxical sleep deprivation modulates depressive-like behaviors by

- regulating the MAOA levels in the amygdala and hippocampus. *Brain Res.* 2017;1664:17-24.
- [27] Tobaldini E, Costantino G, Solbiati M, Cogliati C, Kara T, Nobili L, et al. Sleep, sleep deprivation, autonomic nervous system and cardiovascular diseases. *Neurosci Biobehav Rev.* 2017;74:321-9.
- [28] Lustberg L, Reynolds CF. Depression and insomnia: questions of cause and effect. *Sleep Med Rev.* 2000;4:253-62.
- [29] Terman M, Terman JS, Quitkin FM, McGrath PJ, Stewart JW, Rafferty B. Light therapy for seasonal affective disorder. A review of efficacy. *Neuropsychopharmacology.* 1989;2:1-22.
- [30] Guducu F, Caliyurt O, Vardar E, Tuglu C, Abay E. [Combination therapy using sertraline with sleep deprivation and light therapy compared to sertraline monotherapy for major depressive disorder]. *Turk Psikiyatri Derg.* 2005;16:245-51.
- [31] Wu JC, Kelsoe JR, Schachar C, Bunney BG, DeModena A, Golshan S, et al. Rapid and sustained antidepressant response with sleep deprivation and chronotherapy in bipolar disorder. *Biol Psychiatry.* 2009;66:298-301.
- [32] Leibenluft E, Wehr TA. Is sleep deprivation useful in the treatment of depression? *Am J Psychiatry.* 1992;149:159-68.
- [33] Bunney BG, Bunney WE. Mechanisms of rapid antidepressant effects of sleep deprivation therapy: clock genes and circadian rhythms. *Biol Psychiatry.* 2013;73:1164-71.
- [34] Dopierala E, Rybakowski J. Sleep deprivation as a method of chronotherapy in the treatment of depression. *Psychiatr Pol.* 2015;49:423-33.
- [35] Kuhs H, Farber D, Borgstadt S, Mrosek S, Tolle R. Amitriptyline in combination with repeated late sleep deprivation versus amitriptyline alone in major depression. A randomised study. *J Affect Disord.* 1996;37:31-41.
- [36] Banks S, Dinges DF. Behavioral and physiological consequences of sleep restriction. *J Clin Sleep Med.* 2007;3:519-28.
- [37] Rai D, Zitko P, Jones K, Lynch J, Araya R. Country- and individual-level socioeconomic determinants of depression: multilevel cross-national comparison. *Br J Psychiatry.* 2013;202:195-203.
- [38] Mendenhall E, Kohrt BA, Norris SA, Ndeti D, Prabhakaran D. Non-communicable disease syndemics: poverty, depression, and diabetes among low-income populations. *Lancet.* 2017;389:951-63.
- [39] Aberg-Wistedt A, Agren H, Ekselius L, Bengtsson F, Akerblad AC. Sertraline versus paroxetine in major depression: clinical outcome after six months of continuous therapy. *J Clin Psychopharmacol.* 2000;20:645-52.
- [40] Hua-gang LT-fSX-pSZGJ-hLX-mL. Different Behavioral Activities of Different Mouse Strains Detected by Three Common Tests for Depression. *Chin J Comp Med.* 2011;Vol . 21:20-3.
- [41] Z h u Lie —h e XChongt. Effect of sleep deprivation on serum corticosterone and praxiology in rats with depression. *Chinese Journal of Clinical Rehabilitation* 2005;Vol . 9 156-7.
- [42] Prathiba J, Kumar KB, Karanth KS. Effects of REM sleep deprivation on cholinergic receptor sensitivity and passive avoidance behavior in clomipramine model of depression. *Brain Res.* 2000;867:243-5.
- [43] Jiang Y, Zhu J. Effects of sleep deprivation on behaviors and abnormal hippocampal BDNF/miR-10B expression in rats with chronic stress depression. *Int J Clin Exp Pathol.* 2015;8:586-93.
- [44] Jindal RD, Thase ME. Treatment of insomnia associated with clinical depression. *Sleep Med Rev.* 2004;8:19-30.
- [45] Elsenga S, van den Hoofdakker RH. Clinical effects of sleep deprivation and clomipramine in endogenous depression. *J Psychiatr Res.* 1982;17:361-74.
- [46] Kundermann B, Hemmeter-Spernal J, Huber MT, Krieg JC, Lautenbacher S. Effects of total sleep deprivation in major depression: overnight improvement of mood is accompanied by increased pain sensitivity and augmented pain complaints. *Psychosom Med.* 2008;70:92-101.
- [47] Smith GS, Reynolds CF, 3rd, Houck PR, Dew MA, Ginsberg J, Ma Y, et al. Cerebral glucose metabolic response to combined total sleep deprivation and antidepressant treatment in geriatric depression: a randomized, placebo-controlled study. *Psychiatry Res.* 2009;171:1-9.
- [48] Gest S, Holtmann M, Bogen S, Schulz C, Pniewski B, Legenbauer T. Chronotherapeutic treatments for depression in youth. *Eur Child Adolesc Psychiatry.* 2016;25:151-61.
- [49] de Oliveira RA, Cunha GM, Borges KD, de Bruin GS, dos Santos-Filho EA, Viana GS, et al. The effect of venlafaxine on behaviour, body weight and striatal monoamine levels on sleep-deprived female rats. *Pharmacol Biochem Behav.* 2004;79:499-506.
- [50] Gonzalez-Castaneda RE, Galvez-Contreras AY, Martinez-Quezada CJ, Jauregui-Huerta F, Garcia-Estrada J, Ramos-Zuniga R, et al. Sex-related effects of sleep deprivation on depressive- and anxiety-like behaviors in mice. *Exp Anim.* 2016;65:97-107.



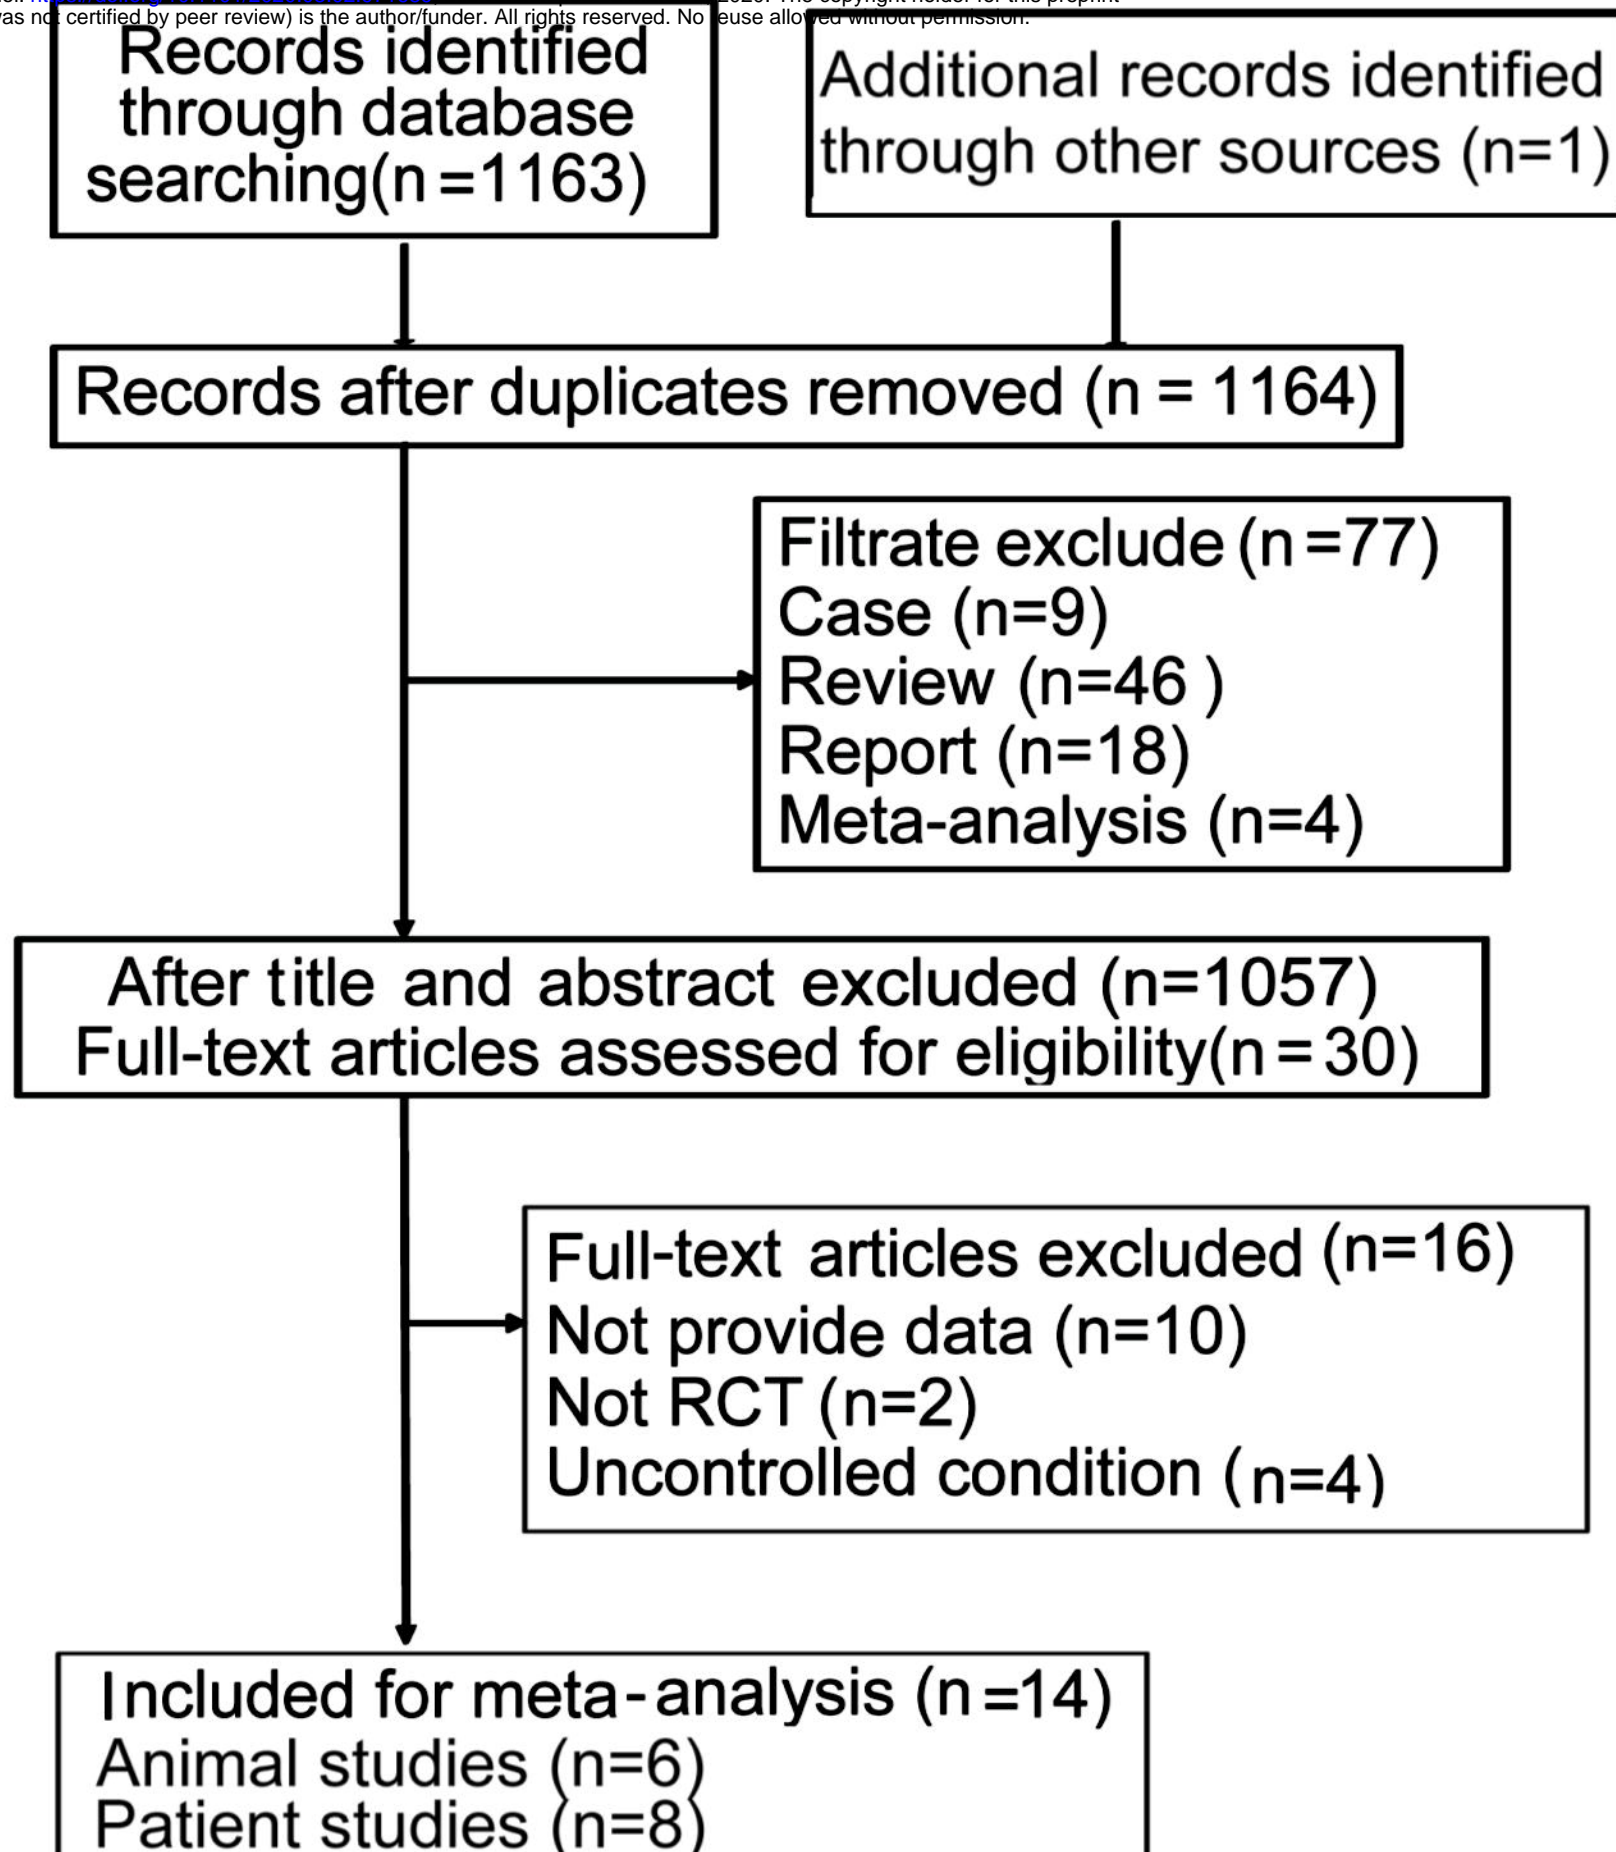

Fig. 1.

(A)

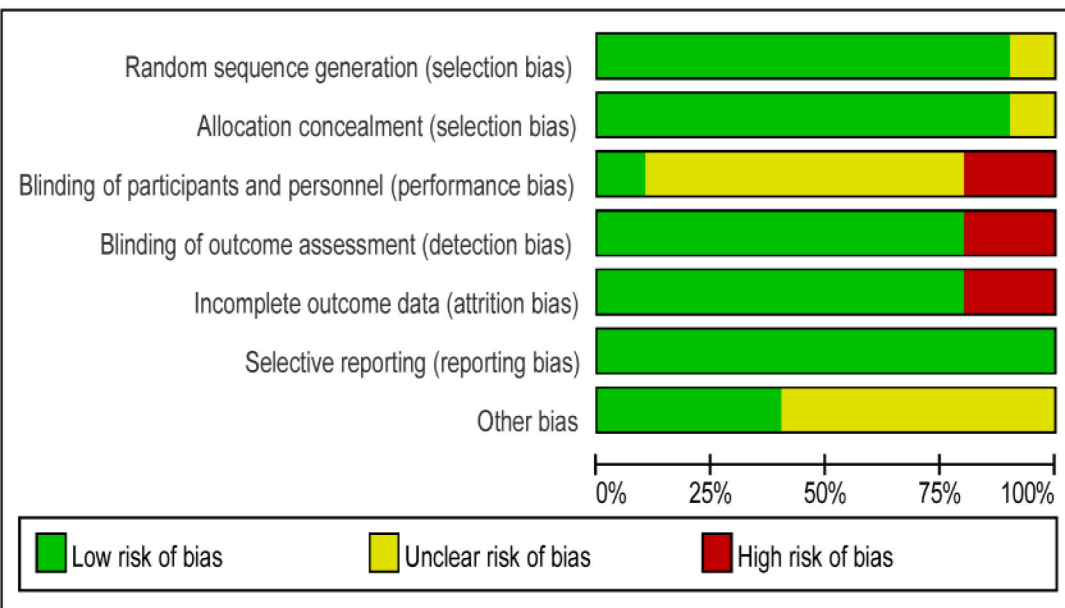

(B)

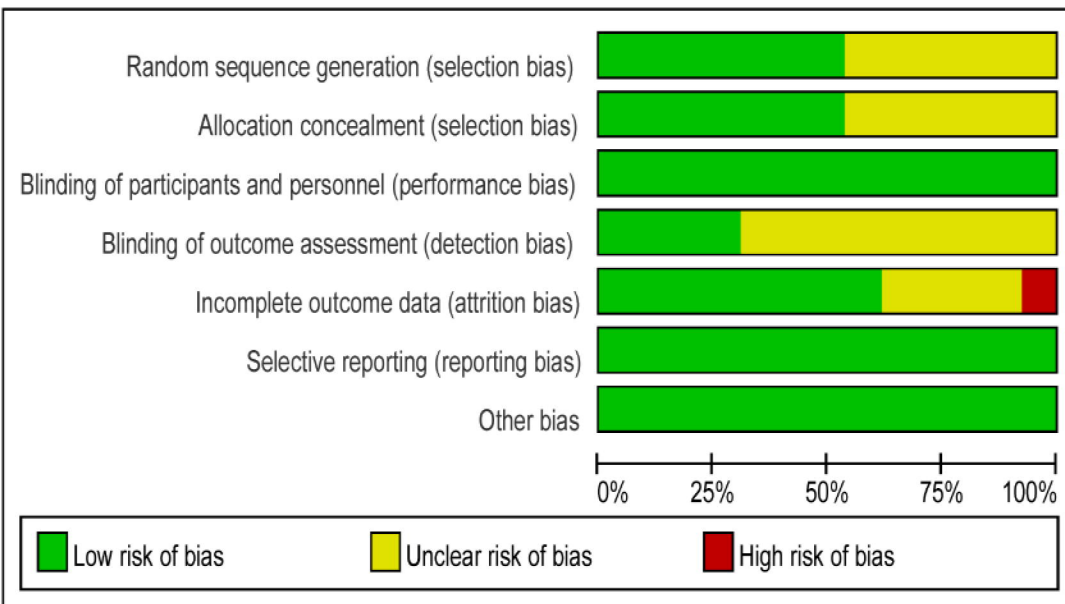

Fig. 2.

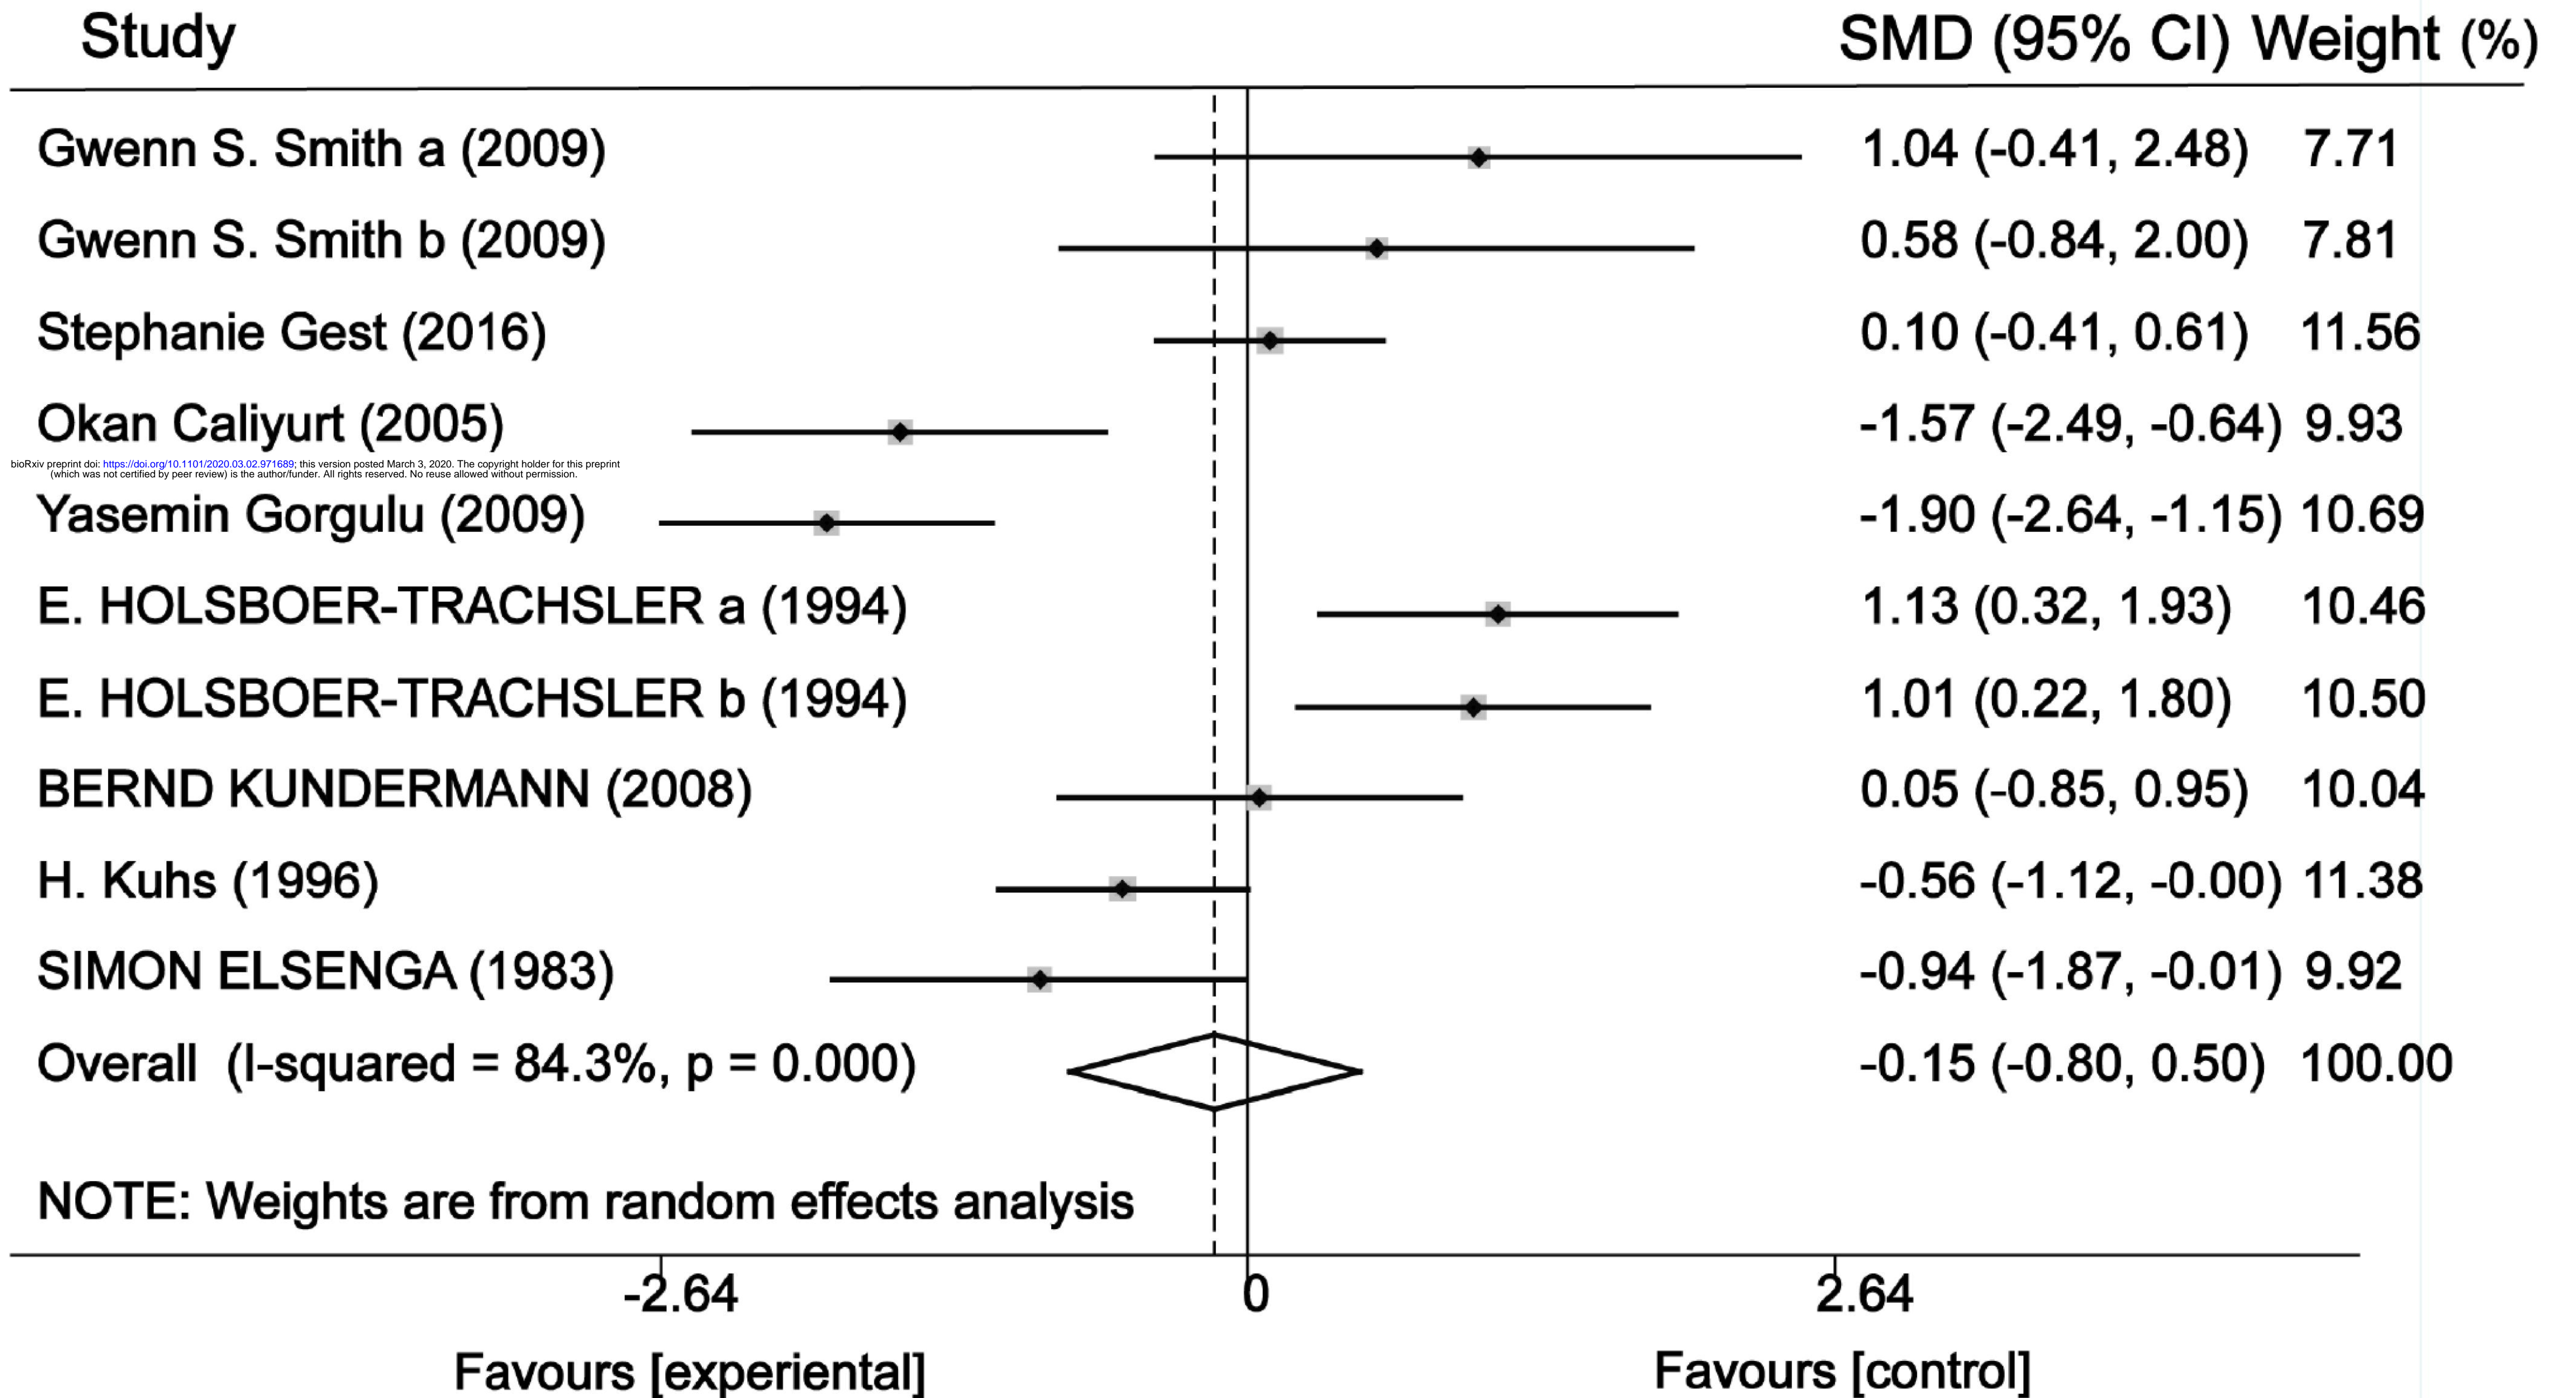

Fig. 3.

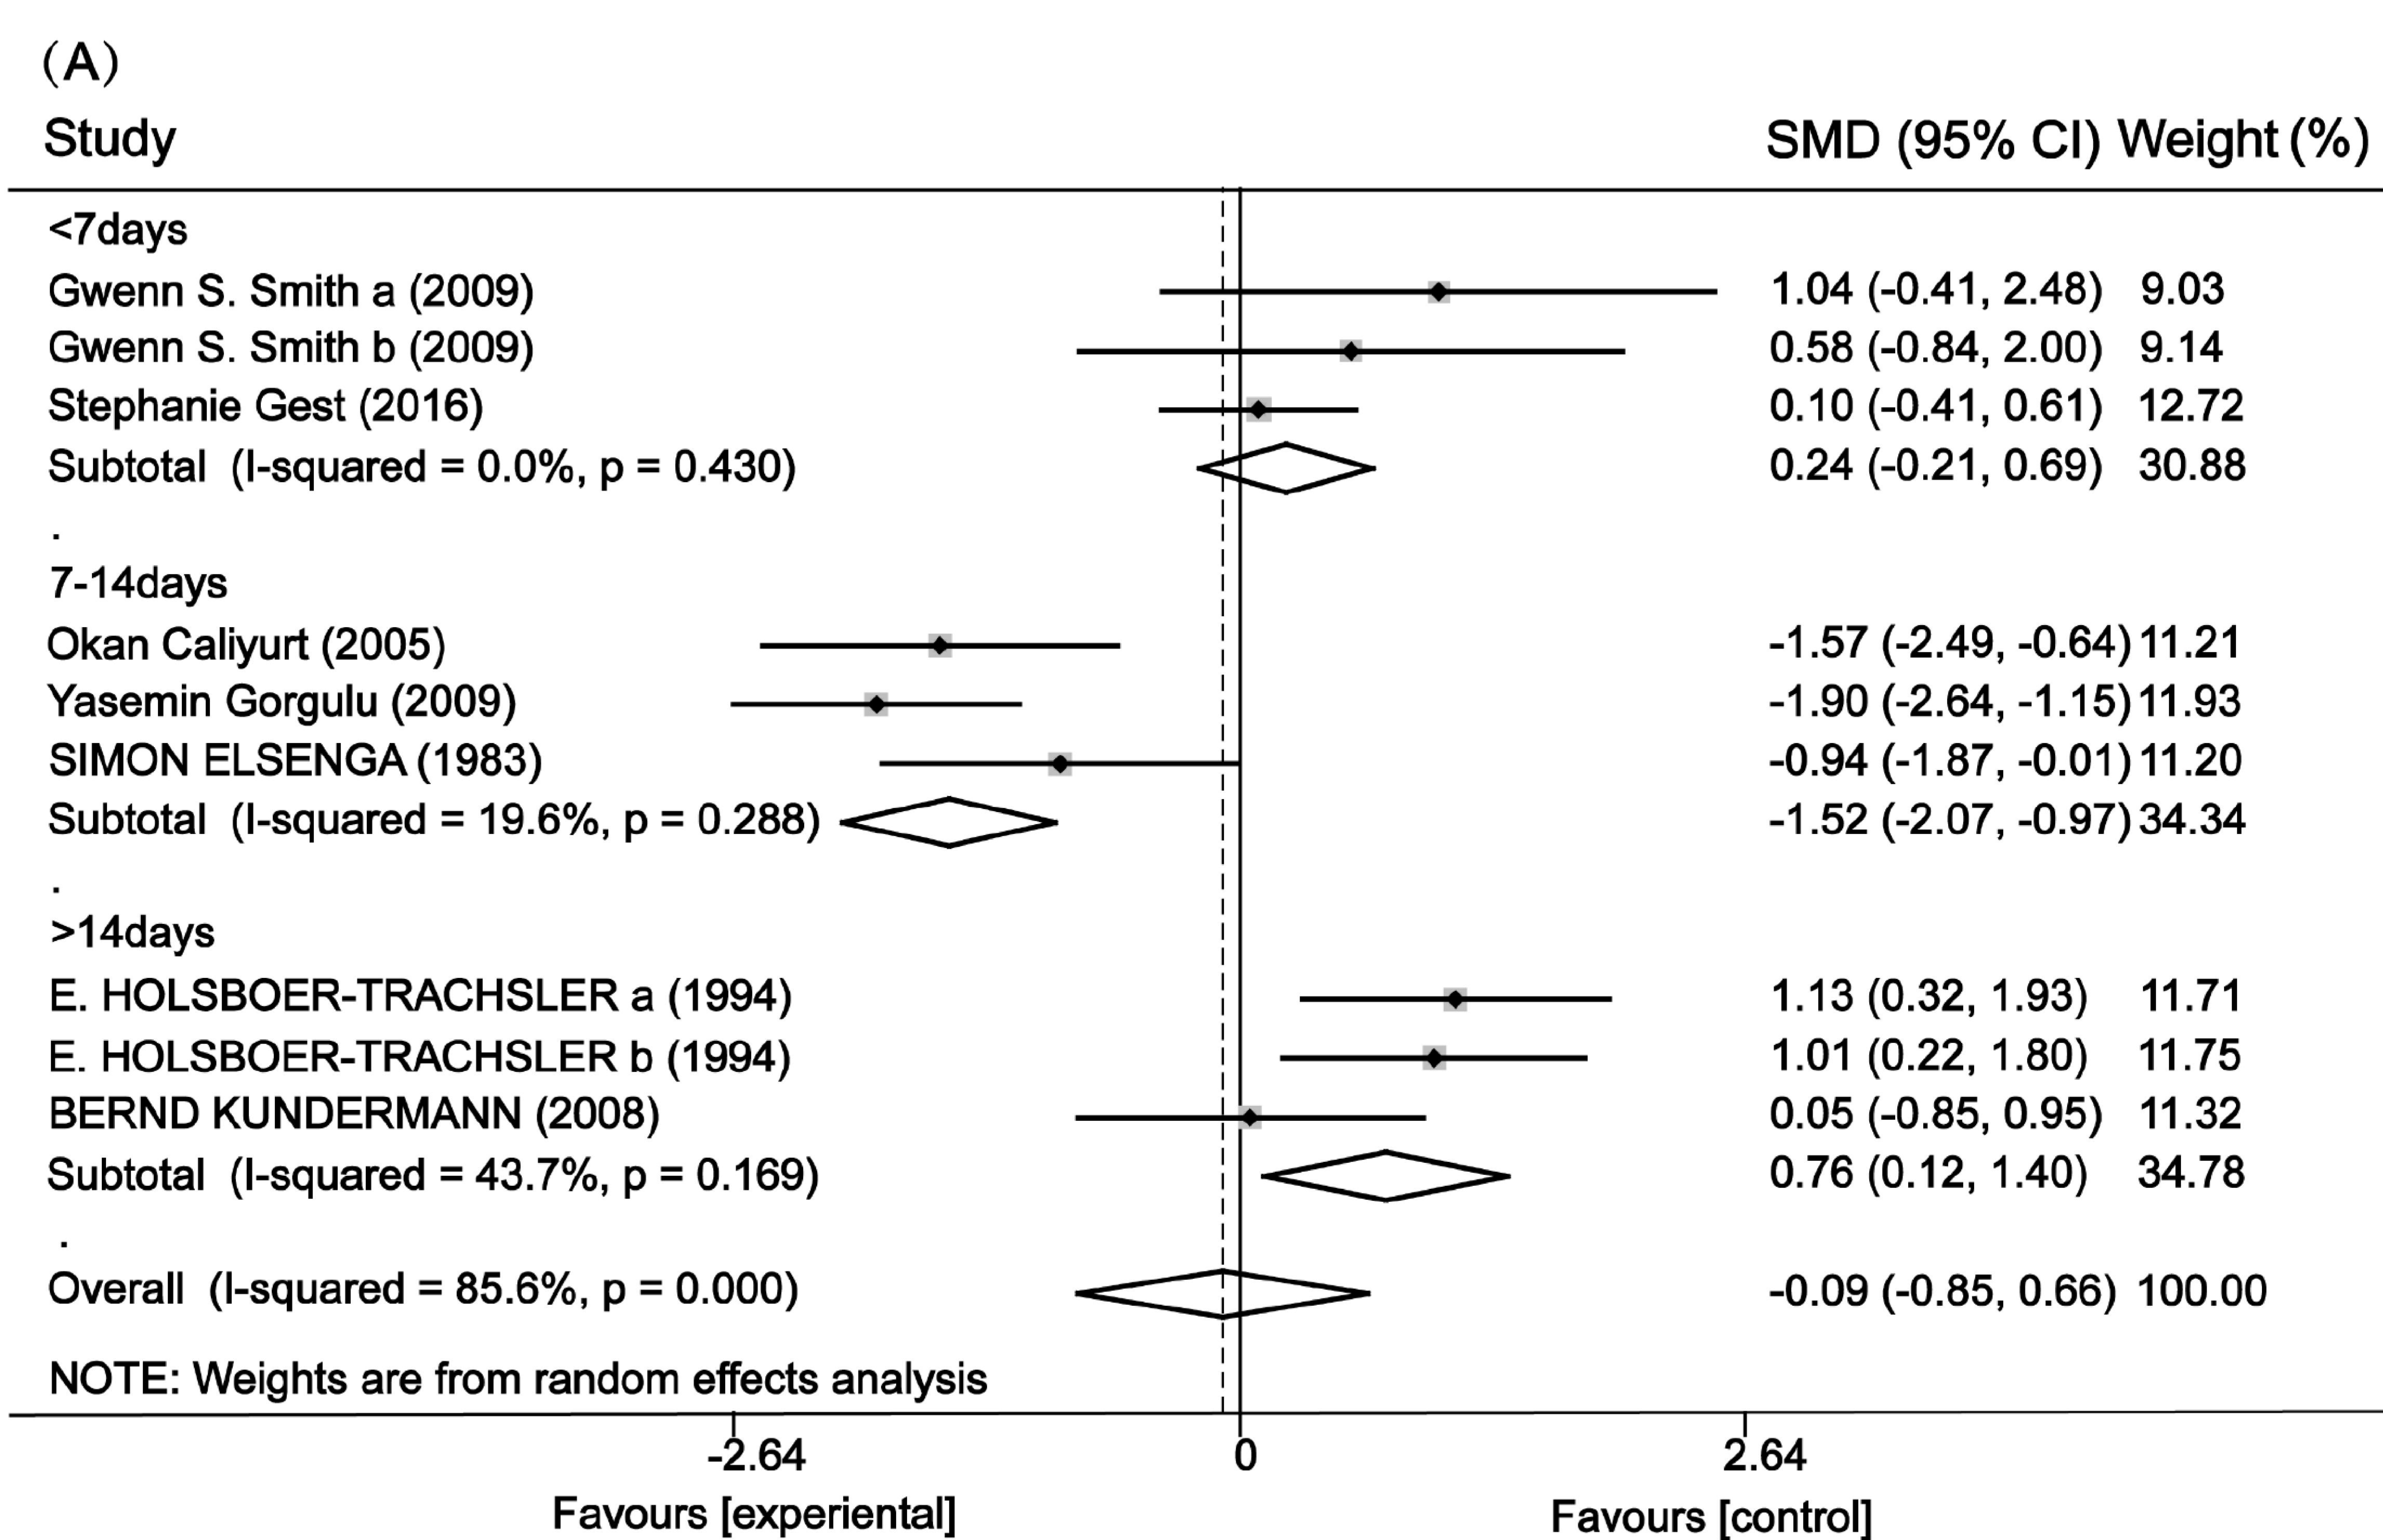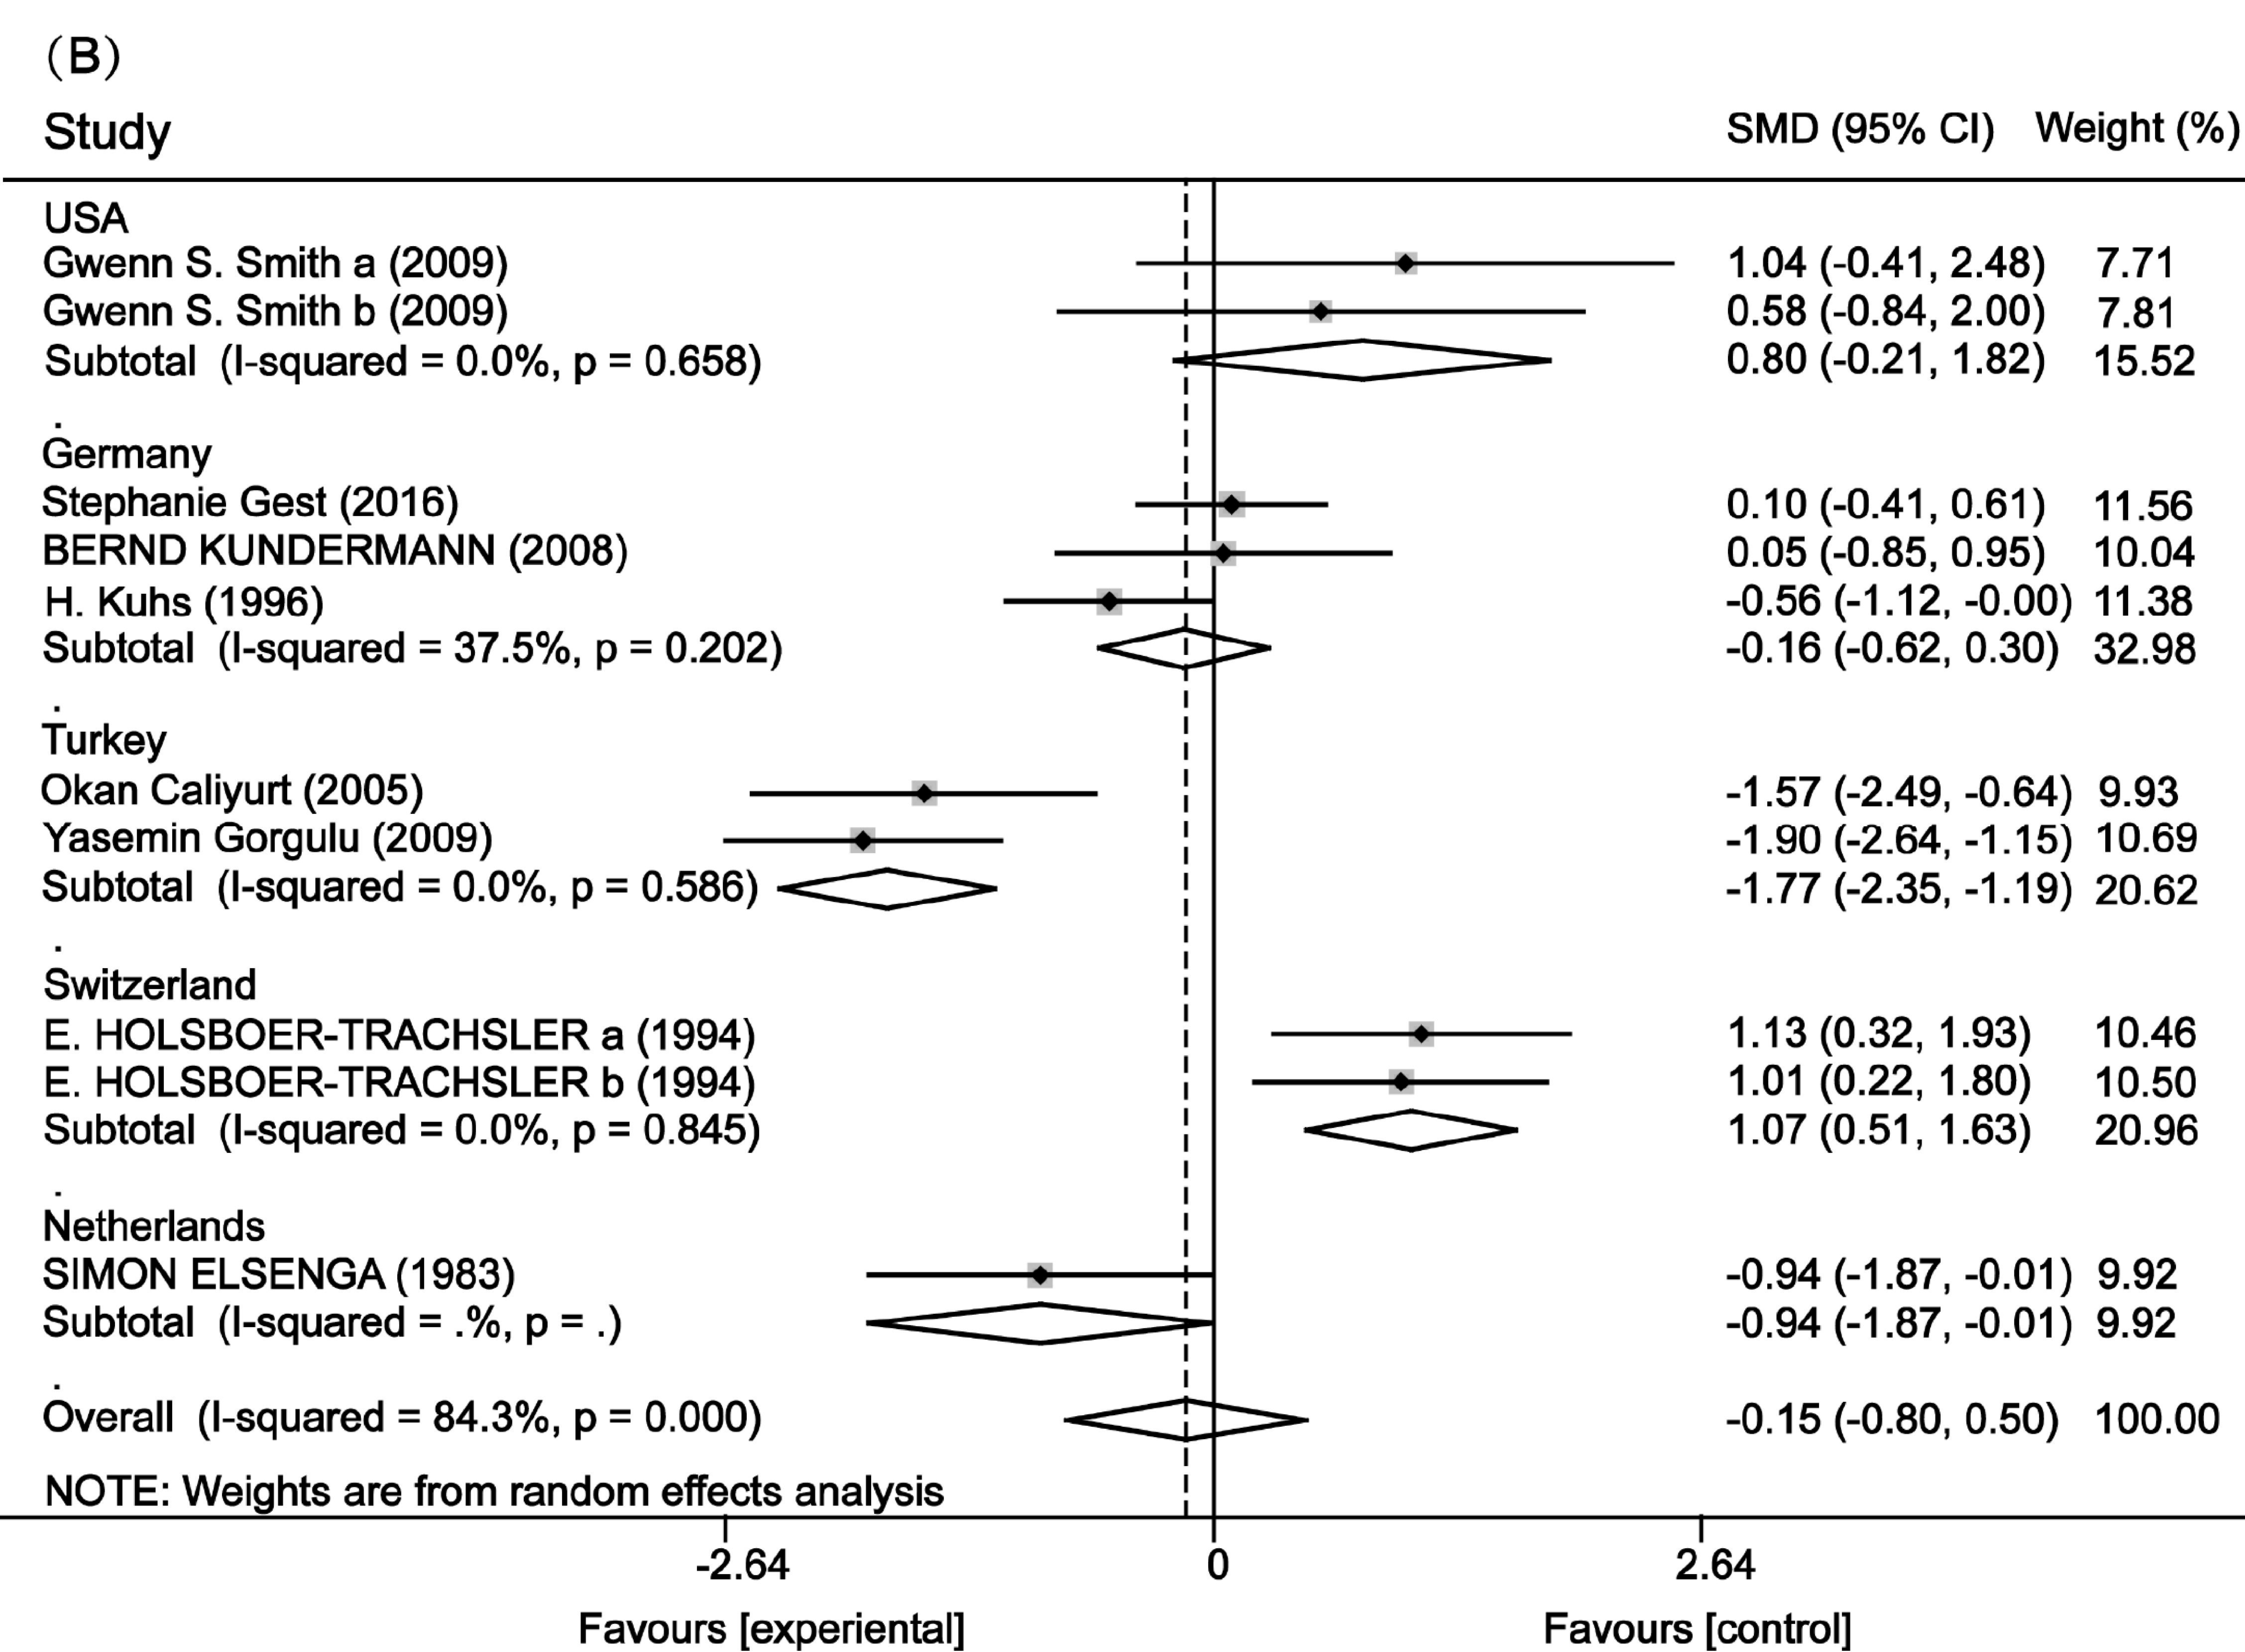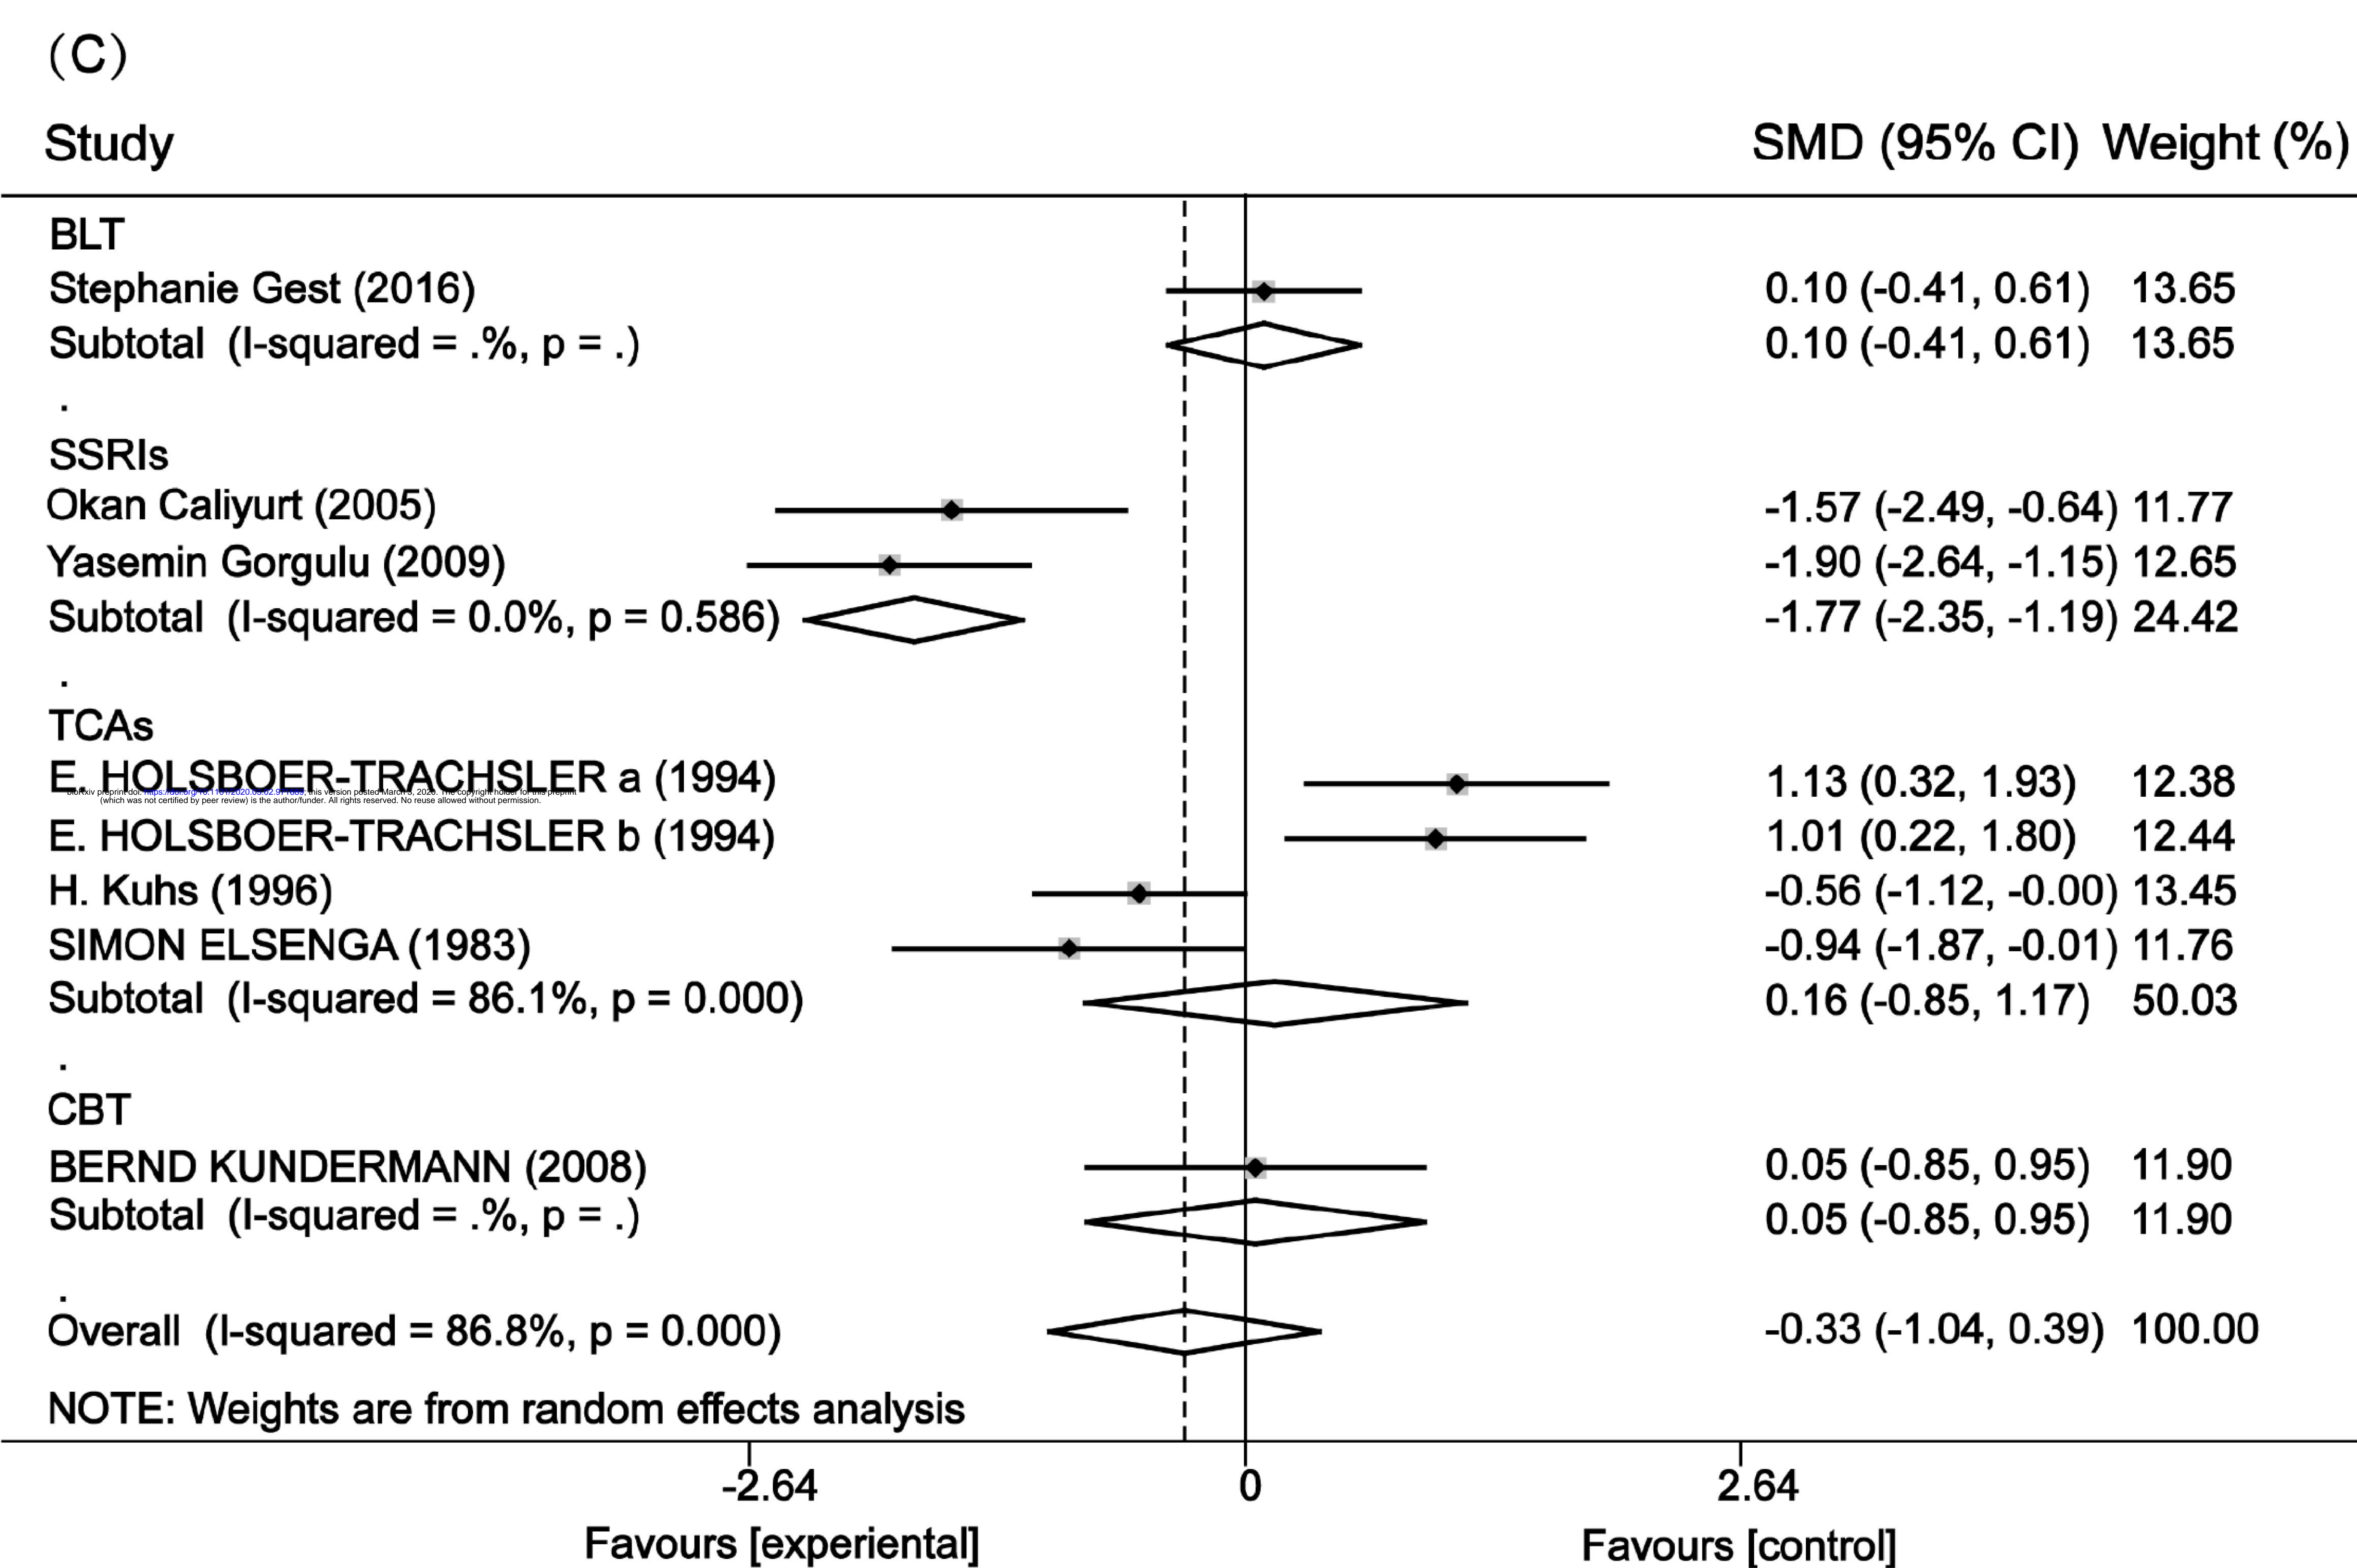

Fig. 4.

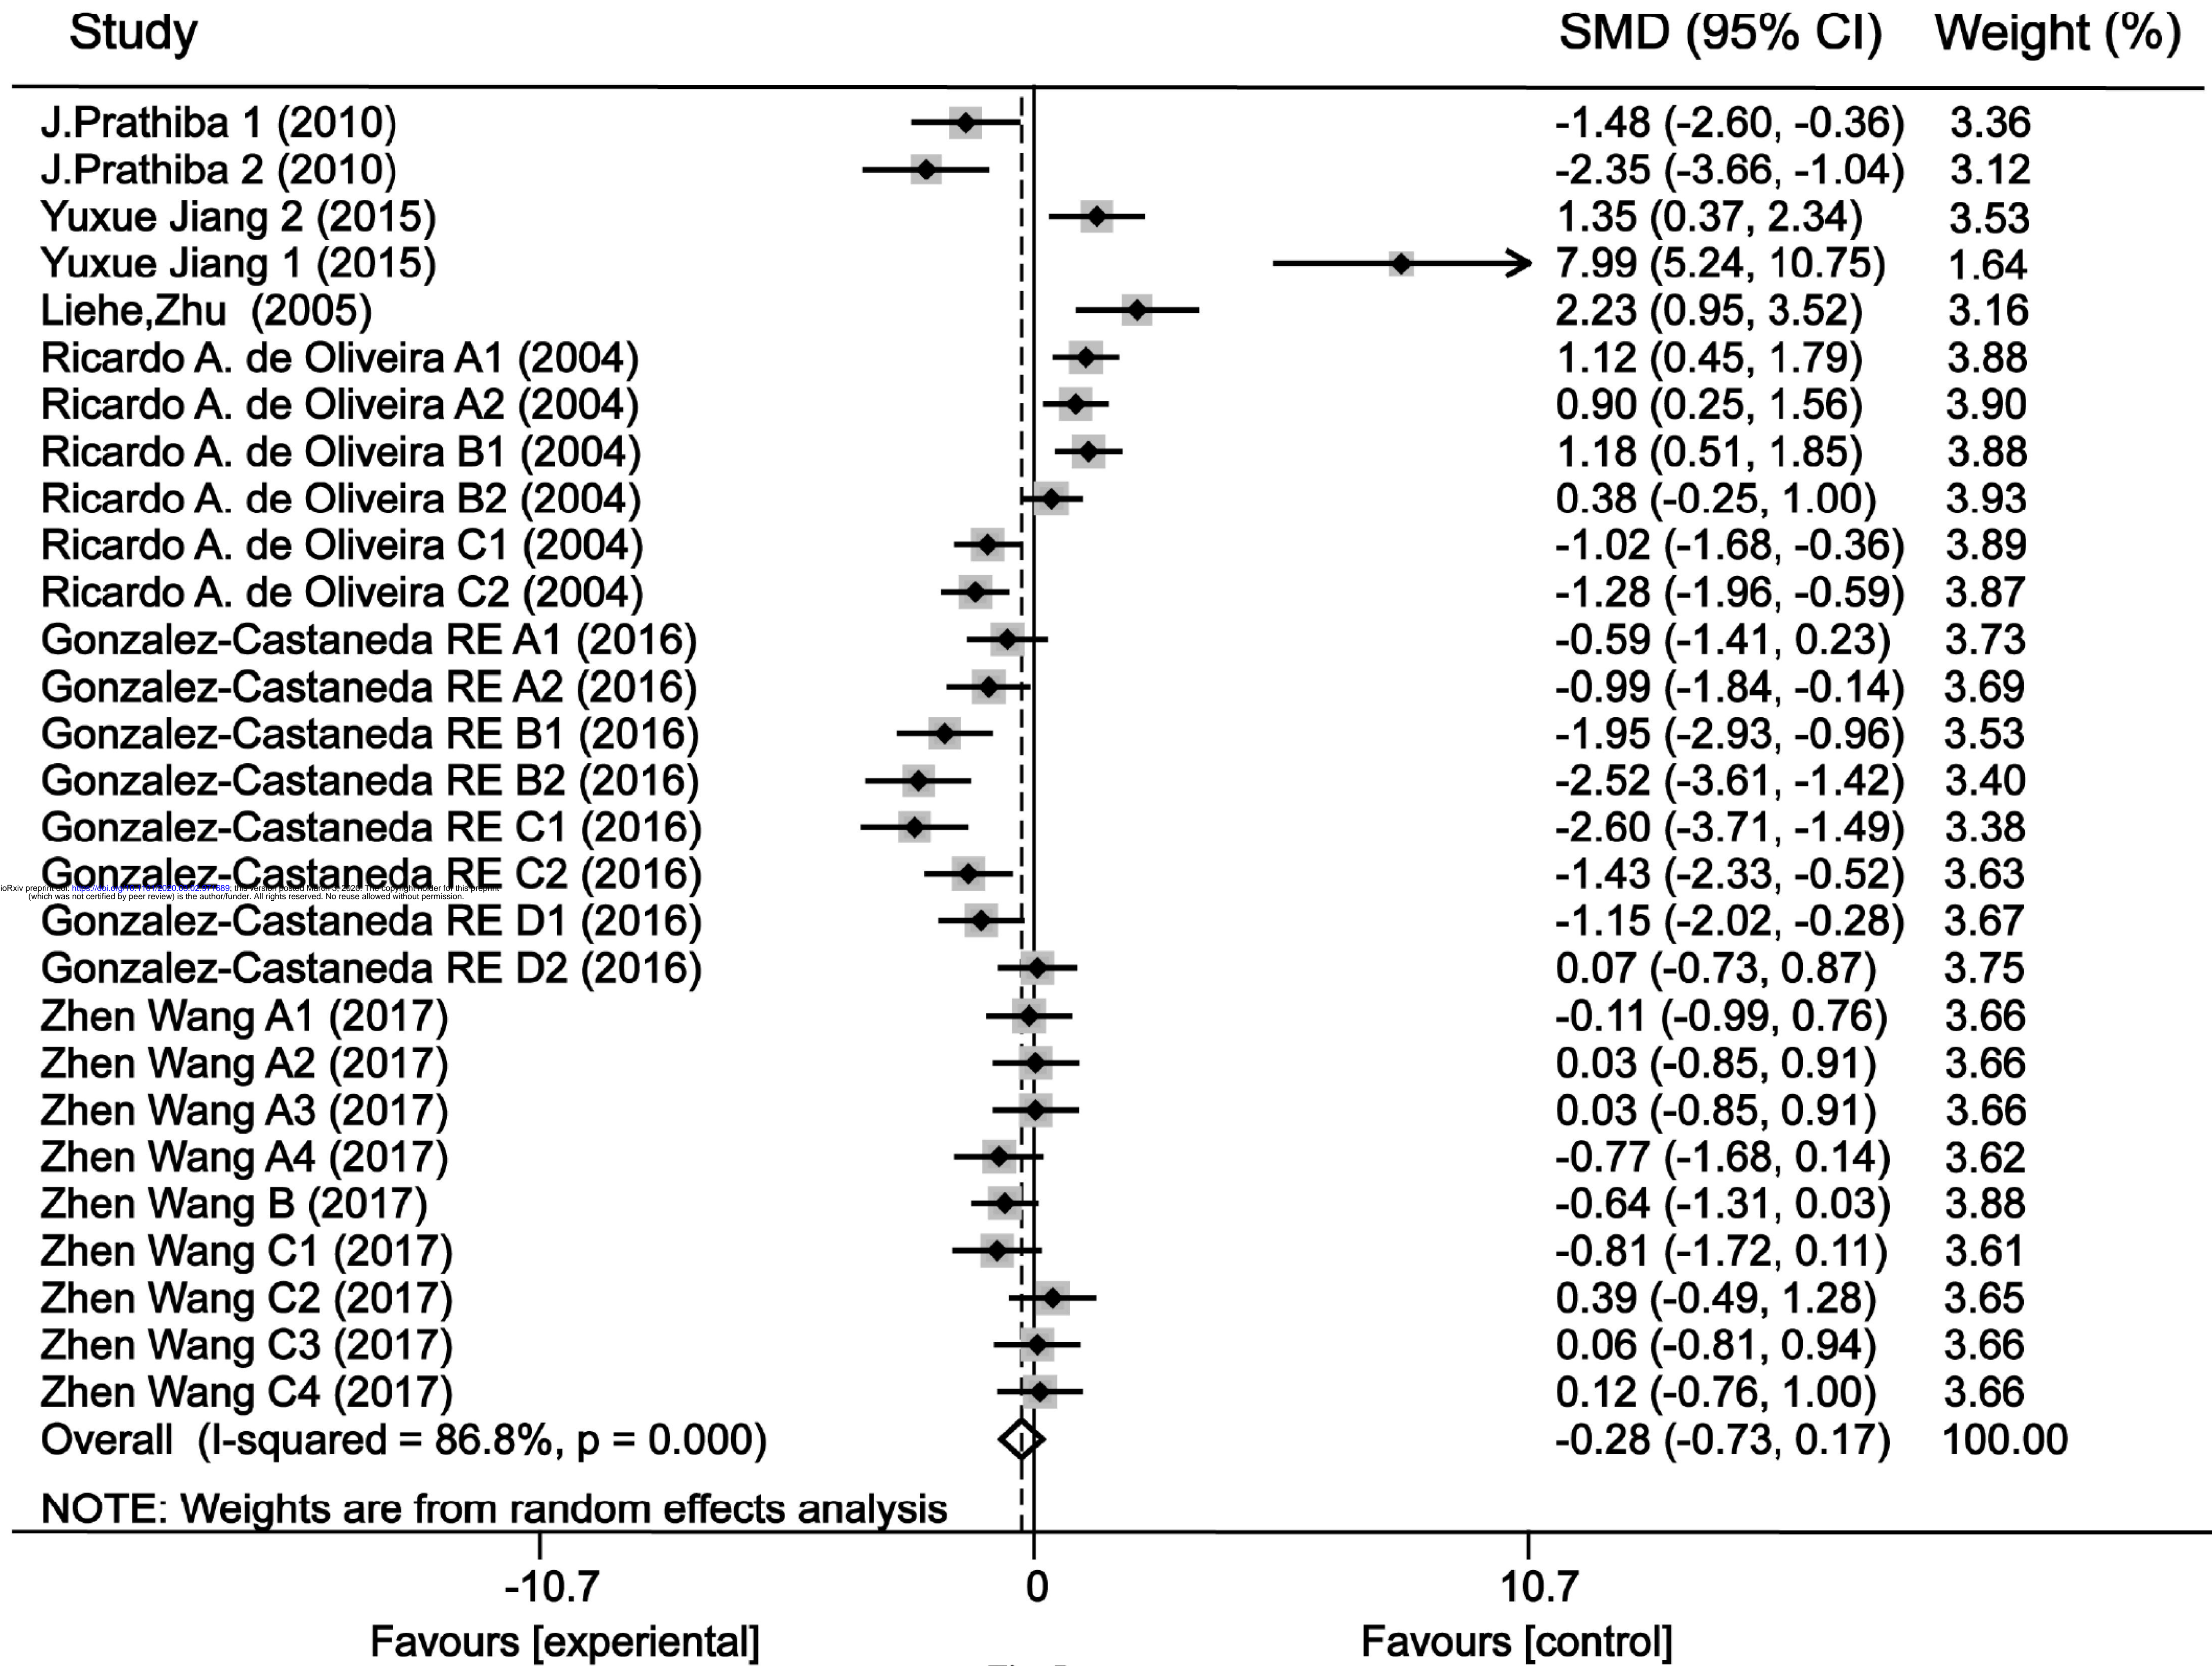

Fig. 5.



(A)

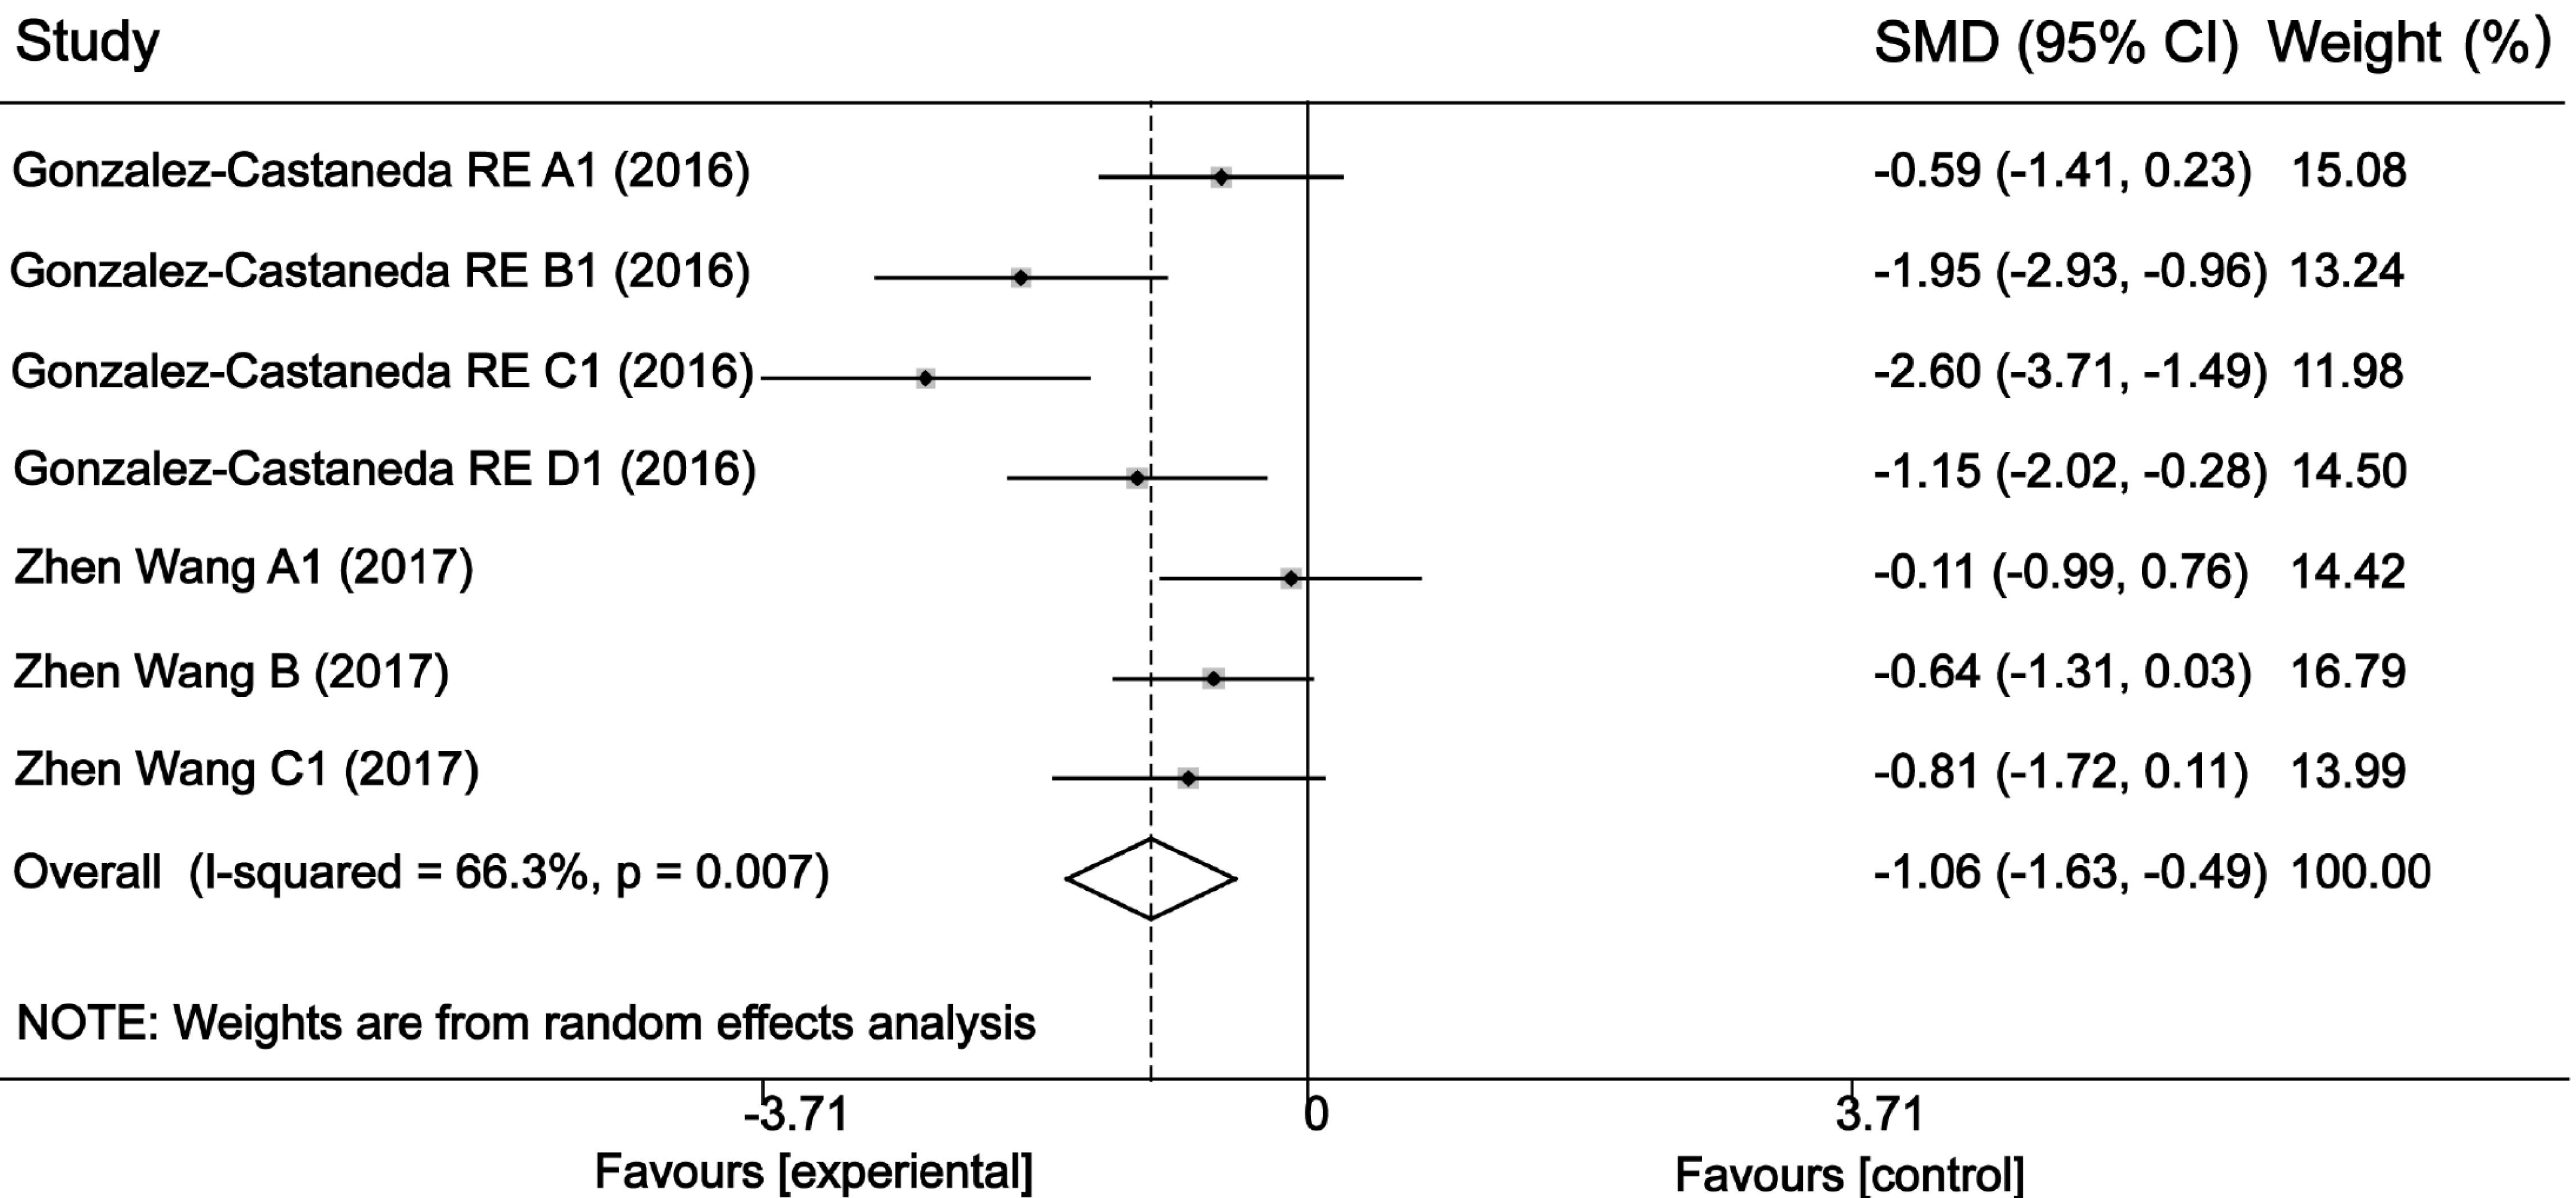

(B)

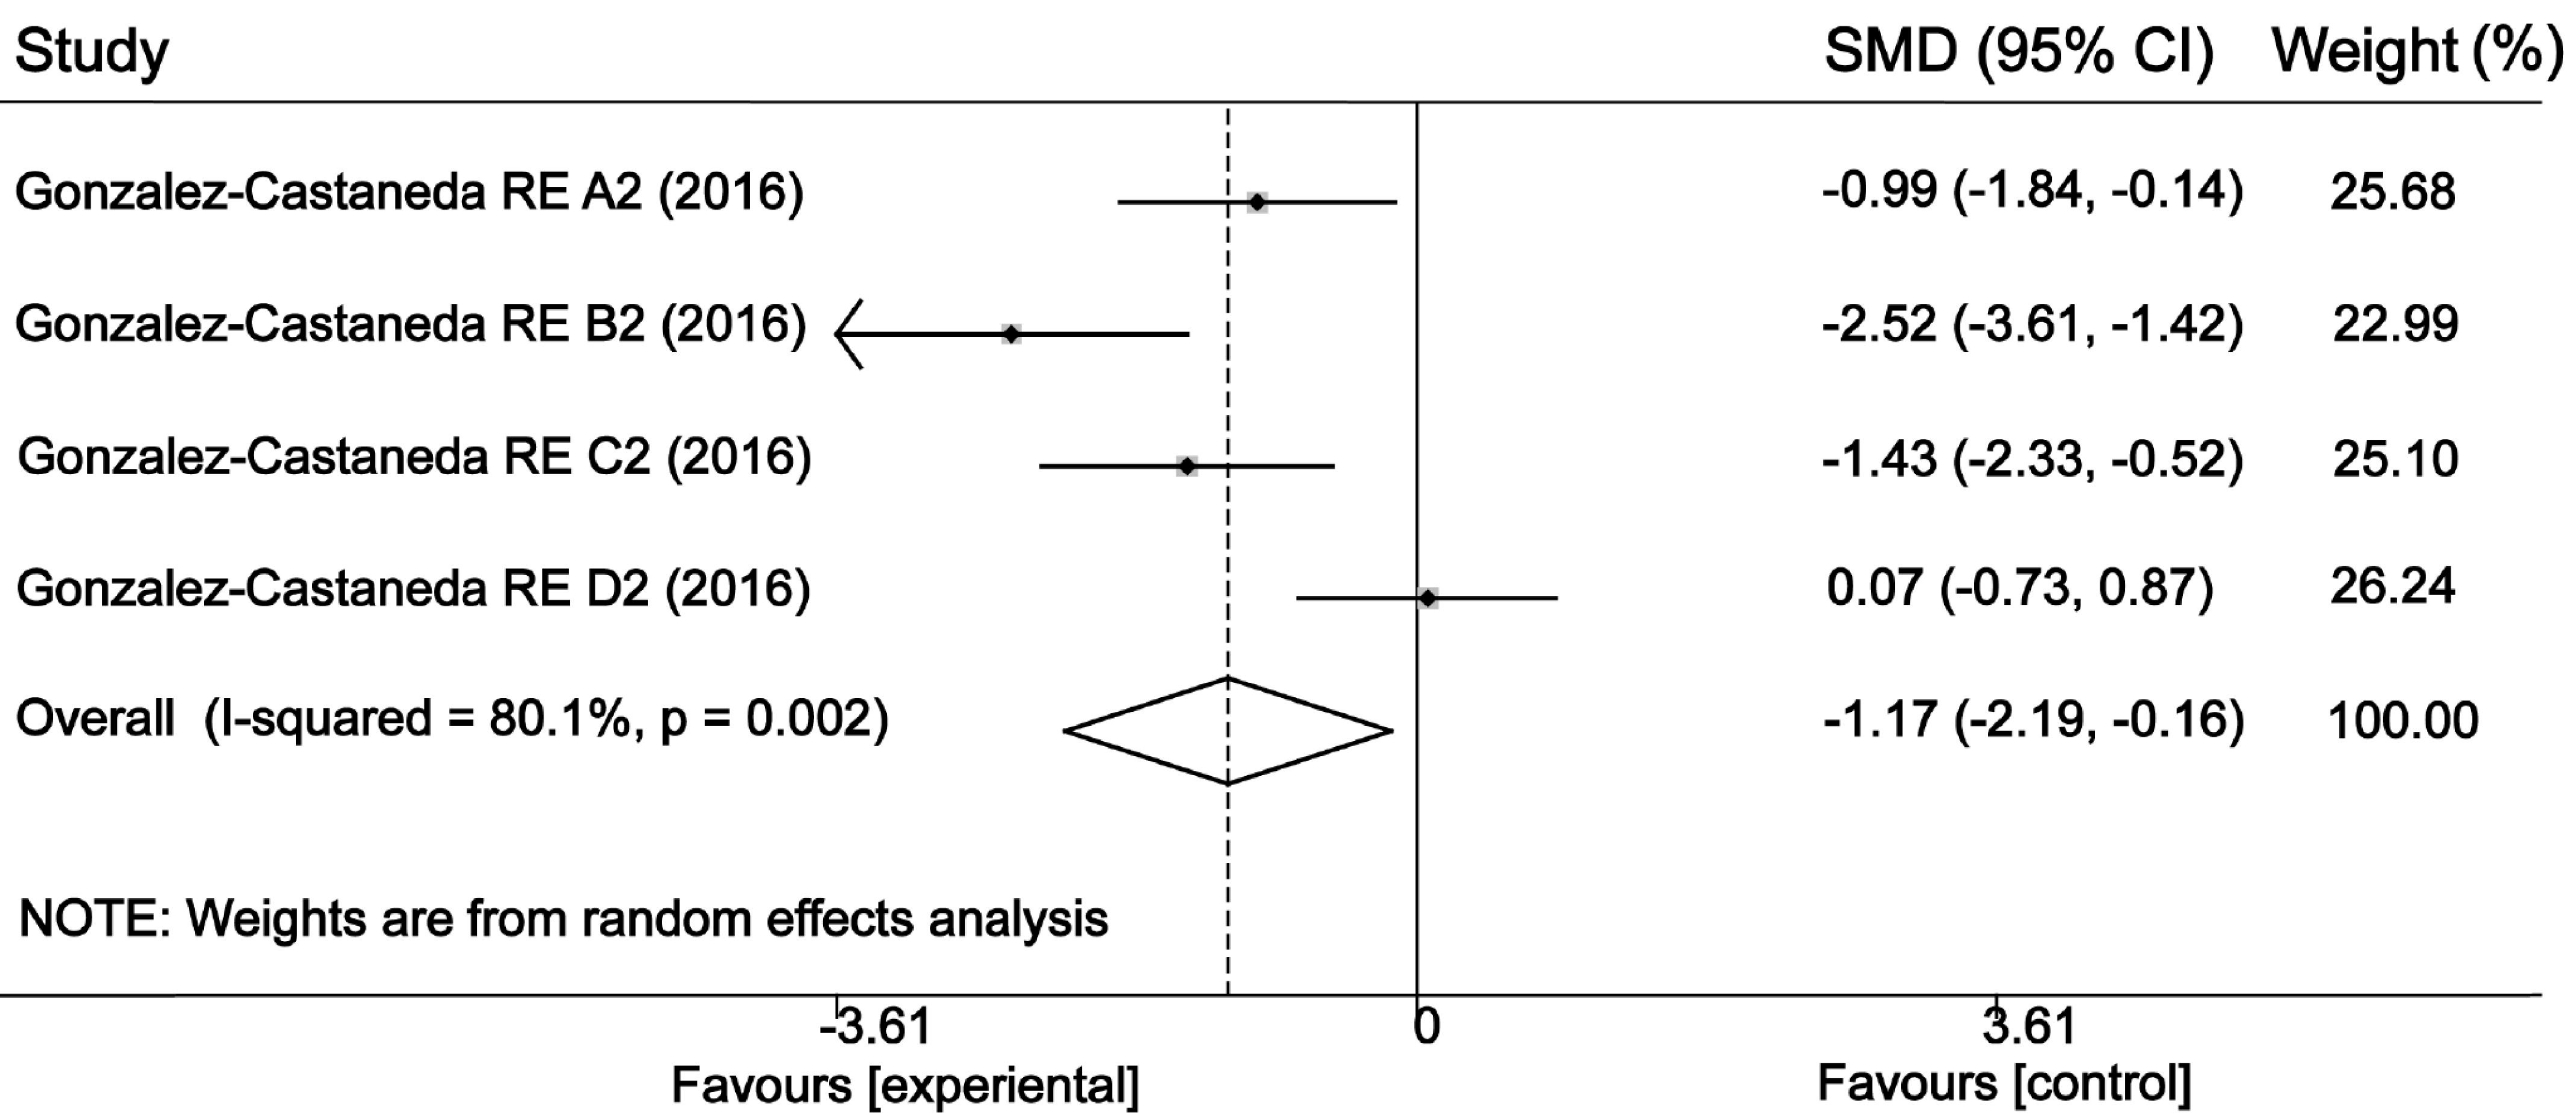

(C)

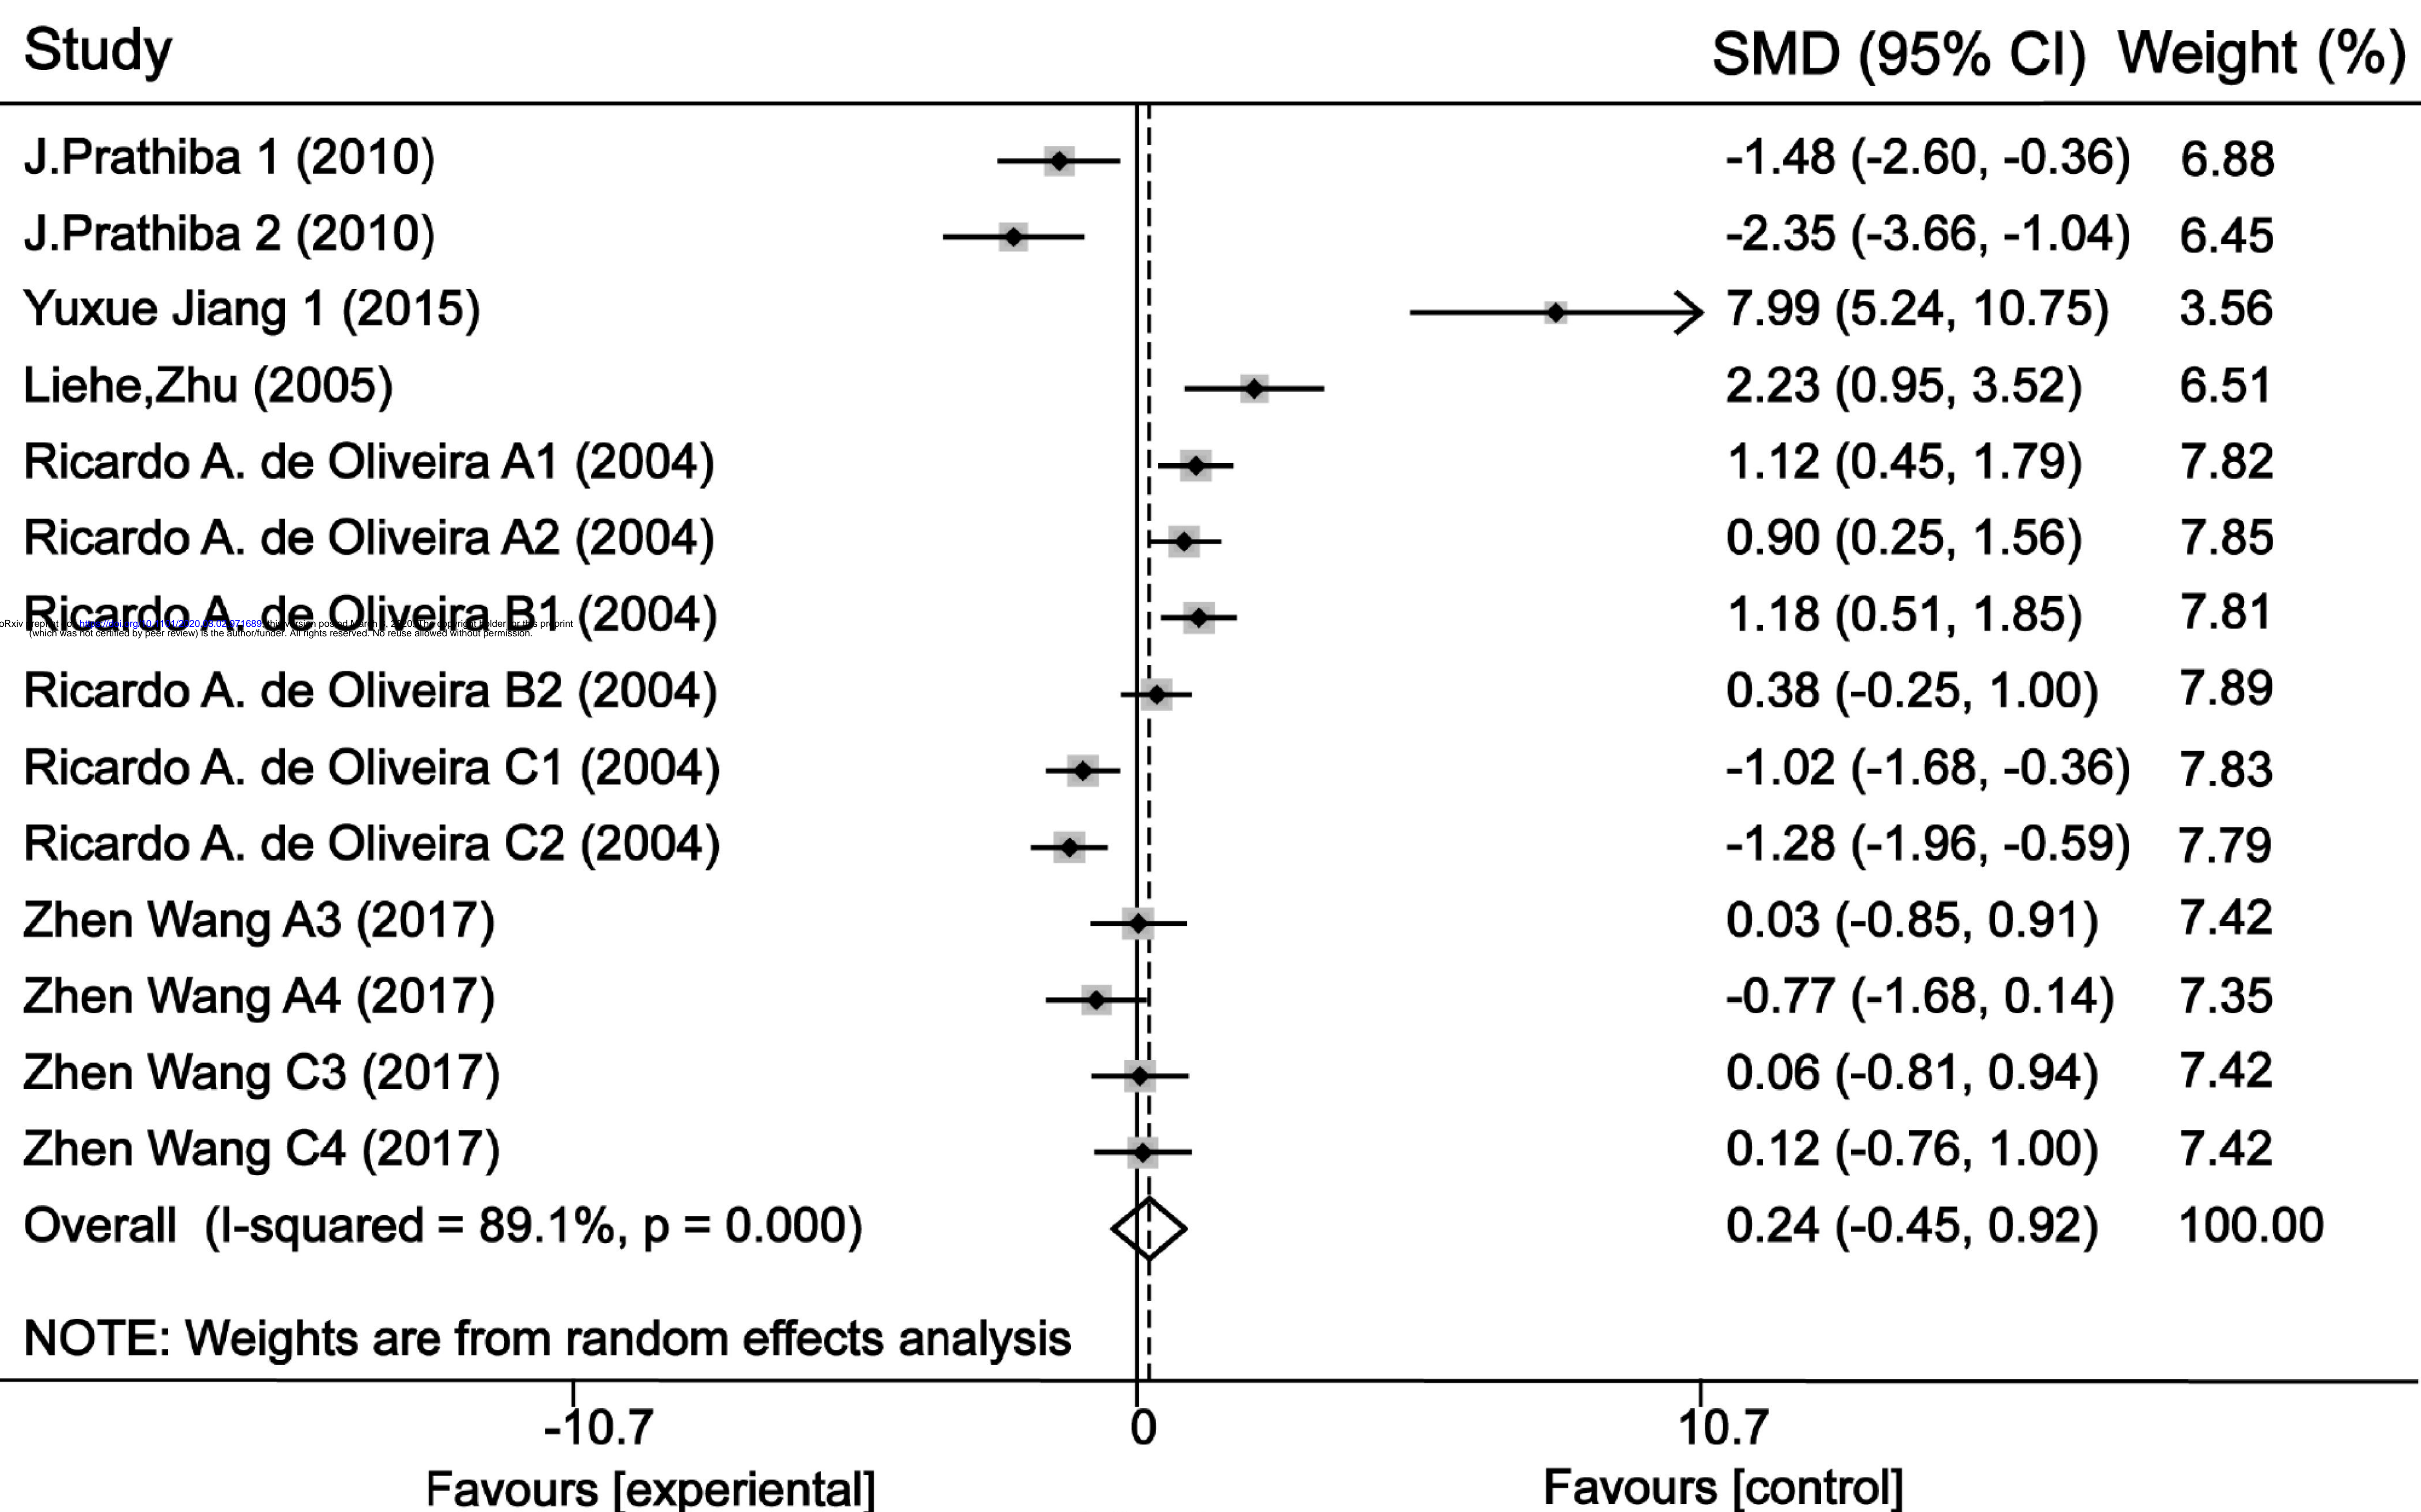

Fig. 6.
